# Supplementary material
Source: publisher figshare collection journal article supplement (https://acs.figshare.com/ndownloader/files/15060806)
Supplement: Supplementary file 1 [file 15060806]

# Supporting Information

## Unexpected Precatalyst $\sigma$ -Ligand Effects in Phenoxyimine Zr-Catalyzed Ethylene/1-Octene Copolymerizations

Yanshan Gao,<sup>1</sup> Matthew D. Christianson,<sup>2</sup> Yang Wang,<sup>1</sup> Jiazhen Chen,<sup>1</sup> Steve Marshall,<sup>2</sup> Jerzy Klosin,<sup>2\*</sup> Tracy L. Lohr,<sup>1\*‡</sup> and Tobin J. Marks<sup>1\*</sup>

<sup>1</sup>Department of Chemistry, Northwestern University, Evanston, IL 60208–3113, USA.

<sup>2</sup>Corporate R&D, The Dow Chemical Company, 1776 Building, Midland, Michigan 48674, USA.

<sup>‡</sup> Current Address: Shell Catalysts & Technologies, Shell Technology Center Houston, 3333 Highway 6 South, Houston, Texas, 77082, USA

\*E-mails: t-marks@northwestern.edu; tracy.lohr@shell.com; jklosin@dow.com

### Contents

|                                                                                                    |           |
|----------------------------------------------------------------------------------------------------|-----------|
| Materials and Methods.....                                                                         | 2         |
| Physical and Analytical Measurements .....                                                         | 3         |
| Synthesis of the Ligand and Complexes .....                                                        | 3         |
| <b>1) Synthesis of FI-H Ligand.....</b>                                                            | <b>3</b>  |
| <b>2) Synthesis of the Complex FI<sub>2</sub>Zr(NMe<sub>2</sub>)<sub>2</sub> (1).....</b>          | <b>4</b>  |
| <b>3) Synthesis of the Complex FI<sub>2</sub>ZrBn<sub>2</sub> (2) .....</b>                        | <b>5</b>  |
| <b>4) Synthesis of the Complex FI<sub>2</sub>ZrMe<sub>2</sub> (3).....</b>                         | <b>5</b>  |
| <b>5) Synthesis of the Complex FI<sub>2</sub>ZrCl<sub>2</sub> (4) .....</b>                        | <b>7</b>  |
| <b>6) Synthesis of the Complex FIAlMe<sub>2</sub>, Al (5) .....</b>                                | <b>7</b>  |
| <b>7) Synthesis of the Complex FIZr(NMe<sub>2</sub>)<sub>3</sub> (6) .....</b>                     | <b>8</b>  |
| <b>8) Synthesis of the Complex Al<sub>2</sub>(NMe<sub>2</sub>)<sub>2</sub>Me<sub>4</sub> .....</b> | <b>8</b>  |
| Polymerization Experiments (Table 1 in the manuscript).....                                        | 9         |
| Polymerization Experiments (Table 2 in the manuscript).....                                        | 10        |
| NMR Spectra of the Ligand and Complexes .....                                                      | 11        |
| <b>1) FI-H Ligand.....</b>                                                                         | <b>11</b> |
| <b>2) Complex FI<sub>2</sub>Zr(NMe<sub>2</sub>)<sub>2</sub> (1).....</b>                           | <b>12</b> |
| <b>3) Complex FI<sub>2</sub>ZrBn<sub>2</sub> (2).....</b>                                          | <b>14</b> |
| <b>4) Complex FI<sub>2</sub>ZrMe<sub>2</sub> (3) .....</b>                                         | <b>15</b> |
| <b>5) Complex FI<sub>2</sub>ZrCl<sub>2</sub> (4).....</b>                                          | <b>17</b> |

|                                                                                                                                                                      |    |
|----------------------------------------------------------------------------------------------------------------------------------------------------------------------|----|
| 6) Complex $\text{FIAlMe}_2$ (5).....                                                                                                                                | 18 |
| 7) Complex $\text{FIZr}(\text{NMe}_2)_3$ (6).....                                                                                                                    | 19 |
| 8) Complex $\text{Me}_3\text{Al}\cdot\text{HNMe}_2$ .....                                                                                                            | 19 |
| 9) Complex $\text{Al}_2(\text{NMe}_2)_2\text{Me}_4$ .....                                                                                                            | 20 |
| NMR Studies of Precatalyst Activation Chemistry .....                                                                                                                | 20 |
| 1) Reaction of $\text{FI}_2\text{ZrMe}_2$ (3) + BT .....                                                                                                             | 21 |
| 2) Reaction of $\text{FI}_2\text{ZrMe}_2$ (3) + BT + TMA to give $\text{FI}_2\text{Zr}^+(\mu\text{-Me})_2\text{AlMe}_2 \text{B}(\text{C}_6\text{F}_5)_4^-$ (7) ..... | 23 |
| 3) Reaction of $\text{FI}_2\text{ZrMe}_2$ (3) + TMA: Slow ancillary ligand transfer! .....                                                                           | 25 |
| 4) Reaction of $\text{FI}_2\text{Zr}(\text{NMe}_2)_2$ (1) + TMA vs. $\text{FI}_2\text{ZrMe}_2$ (3) + TMA and $\text{FIAlMe}_2$ (5) + TMA .....                       | 26 |
| Attempted Use of Mono-FI Precatalyst $\text{FIZrBn}_3$ as a Control.....                                                                                             | 27 |
| X-Ray Data Collection, Structure Solution, and Refinement .....                                                                                                      | 28 |
| Buried Volume Calculations .....                                                                                                                                     | 44 |
| Polymer Characterization.....                                                                                                                                        | 46 |
| References.....                                                                                                                                                      | 52 |

## Materials and Methods

All manipulations of air-sensitive materials were performed with rigorous exclusion of  $\text{O}_2$  and moisture in oven-dried Schlenk-type glassware on a dual manifold Schlenk line, interfaced to a high-vacuum line ( $10^{-6}$  Torr), or in a  $\text{N}_2$ -filled MBraun glove box with a high-capacity recirculator ( $<1$  ppm  $\text{O}_2$ ). Argon (Airgas, pre-purified grade) was purified by passage through a supported  $\text{MnO}$  oxygen-removal column and an activated Davison 4 Å molecular sieve column. Ethylene (Airgas) was purified by passage through an oxygen/moisture trap (Matheson, model MTRP-0042-XX). Hydrocarbon solvents (*n*-pentane and toluene) were dried using activated alumina columns according to the method described by Grubbs<sup>1</sup> and were additionally vacuum-transferred from Na/K alloy immediately before vacuum line manipulations.  $\text{C}_6\text{D}_6$  and  $\text{C}_7\text{D}_8$  (Cambridge Isotope Laboratories, 99+ atom %D) were stored over Na/K alloy in vacuum and vacuum transferred immediately prior to use. The solvents 1,2-difluorobenzene (DFB) and  $\text{CDCl}_3$  were distilled from  $\text{CaH}_2$  and stored over activated Davison 4 Å molecular sieves. All other reagents, including 1,1,2,2-tetrachloroethane-*d*<sub>2</sub>, were used as received.

## Physical and Analytical Measurements

NMR spectra were recorded on Varian UNITY Inova-500 (FT, 500 MHz,  $^1\text{H}$ ; 125 MHz,  $^{13}\text{C}$ ), UNITY Inova-400 (FT, 400 MHz,  $^1\text{H}$ ; 100 MHz,  $^{13}\text{C}$ ), Agilent DD2-HCN600 (FT, 600 MHz,  $^1\text{H}$ ; 150 MHz,  $^{13}\text{C}$ ) or Bruker ASCEND-400 (FT, 400.13 MHz,  $^1\text{H}$ ; 100.60 MHz,  $^{13}\text{C}$ ). Chemical shifts for  $^1\text{H}$  and  $^{13}\text{C}$  spectra were referenced using internal solvent resonances and are reported relative to tetramethylsilane (TMS). NMR experiments on air-sensitive samples were conducted in Teflon valve-sealed sample tubes (J-Young). Elemental analyses (CHN) were performed by Midwest Microlab, Indianapolis, Indiana.  $^{13}\text{C}$ NMR analysis of polymer microstructure were conducted in 1,1,2,2-tetrachloroethane- $d_2$  at 120 °C with delay time ( $d_1$ ) = 10 sec. Signals were assigned according to the literature for these polymers.<sup>2</sup> High temperature Gel Permeation Chromatography (GPC) for samples in Table 1 of the manuscript was carried out in 1,2,4-trichlorobenzene (stabilized with 125 ppm of BHT) at 150 °C on a Polymer Laboratories 220 instrument equipped with a set of three PLgel 10 $\mu\text{m}$  mixed-B columns with differential refractive index, viscosity, and light scattering (15° and 90°) detectors. Data reported were determined via triple detection. High temperature GPC analysis for samples in Table 2 of the manuscript was performed using a PolymerChar GPC with infrared detector (IR5) and a set of four Agilent PLgel MIXED-A columns. Octene incorporation for samples in Table 2 of the manuscript was determined by comparing the methyl and methylene signals recorded by the GPC IR5 detector using a linear calibration from co-polymers of known composition.

## Synthesis of the Ligand and Complexes

### 1) Synthesis of FI-H Ligand

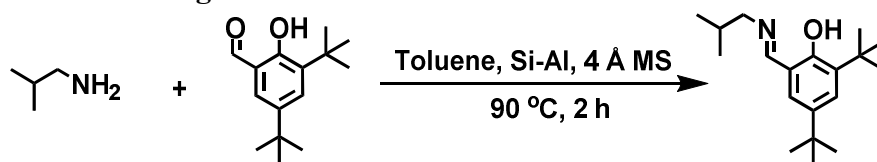

**3,5-Di-tert-butyl-2-hydroxybenzaldehyde** (3.86 g, 16.5 mmol, 1.0 equiv), **isobutyl amine** (3.65 g, 50.0 mmol, 3.03 equiv), silicon-alumina, and 4Å molecular sieves were combined in anhydrous toluene (50 mL) in a 100-mL round bottom flask. The reaction was then heated to 90 °C for 2 h. After the reaction period, the solution was filtered through celite, and the filtrate was concentrated to dryness and kept under high vacuum overnight to yield the product as a dark yellow solid (4.67 g, 98% yield).  $^1\text{H}$  NMR (400 MHz,  $\text{CDCl}_3$ )  $\delta$  13.98 (s, 1H), 8.32 (s, 1H), 7.38 (d,  $J$  =

2.4 Hz, 1H), 7.09 (d,  $J = 2.4$  Hz, 1H), 3.41 (dd,  $J = 6.5, 1.2$  Hz, 2H), 1.46 (s, 9H), 1.32 (s, 9H), 0.99 (d,  $J = 6.7$  Hz, 6H).  $^{13}\text{C}$  NMR (101 MHz,  $\text{CDCl}_3$ )  $\delta$  165.86, 158.45, 139.94, 136.82, 126.80, 125.84, 118.02, 67.74, 35.19, 34.27, 31.67, 29.82, 29.59, 20.71. Elem. Anal. Calcd for  $\text{C}_{19}\text{H}_{31}\text{NO}$ : C 78.84, H 10.80, N 4.84; Found: C 78.77, H 10.69, N 4.89

## 2) Synthesis of the Complex $\text{FI}_2\text{Zr}(\text{NMe}_2)_2$ (1)

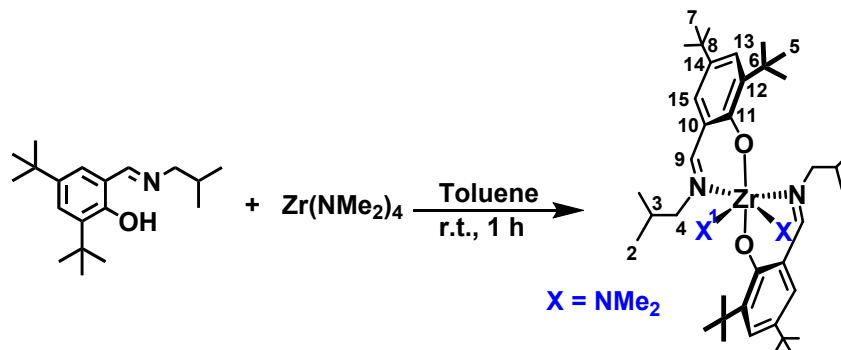

$\text{Zr}(\text{NMe}_2)_4$  (1.32 g, 4.94 mmol, 1.0 equiv) and **FI-H** ligand (3.00 g, 10.38 mmol, 2.1 equiv) were combined in toluene (30 mL) at rt. After 1 h, all volatiles were removed in vacuo, and the resulting solid was washed with pentane. The resulting yellow solid was then collected and dried under high vacuum. The filtrate was concentrated for further crystallization, and a second crop of product was then collected (3.14 g, 84% yield). Single crystals suitable for X-Ray diffraction studies were grown from a solution of toluene/*n*-hexane at rt.  $^1\text{H}$  and  $^{13}\text{C}$  NMR peaks were assigned through a combined analysis of  $^1\text{H}$  NMR,  $^{13}\text{C}$  NMR,  $^1\text{H}$ ,  $^1\text{H}$ -gCOSY, gHSQCAD, and gHMBCAD spectroscopy.  $^1\text{H}$  NMR (400 MHz,  $\text{C}_6\text{D}_6$ )  $\delta$  7.87 (s, 2H, H9), 7.79 (d,  $J = 2.6$  Hz, 2H, H15), 7.22 (d,  $J = 2.5$  Hz, 2H, H13), 3.51 (dd,  $J = 10.4, 4.0$  Hz, 2H, H4), 3.23 (s, 12H, H1), 2.41 (t,  $J = 10.4$  Hz, 2H, H4'), 1.95 (m, 2H, H3), 1.83 (s, 18H, H5), 1.32 (s, 18H, H7), 0.57 (t,  $J = 6.9$  Hz, 12H, H2).  $^{13}\text{C}$  NMR (101 MHz,  $\text{C}_6\text{D}_6$ )  $\delta$  168.04 (C9), 160.37, 139.76, 139.29, 129.66, 129.12, 122.63, 70.43 (C4), 45.33 (C1), 35.94, 34.30, 31.70, 30.13, 28.80 (C3), 21.49 (C2), 19.84 (C2'). Elem. Anal. Calcd for  $\text{C}_{42}\text{H}_{72}\text{N}_4\text{O}_2\text{Zr}$ : C 66.70, H 9.60, N 7.41; Found: C 66.82, H 9.76, N 7.26

### 3) Synthesis of the Complex $\text{Fl}_2\text{ZrBn}_2$ (2)

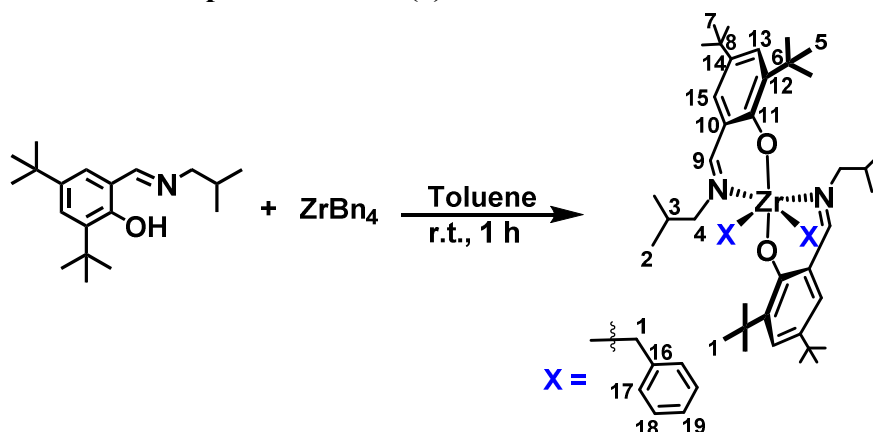

**ZrBn<sub>4</sub>** (0.46 g, 1.00 mmol, 1.0 equiv) and **FI-H** ligand (0.58 g, 2.00 mmol, 2.0 equiv) were combined in toluene (20 mL) at rt. After 1 h, all volatiles were removed in vacuo, and the resulting solid was dissolved in *n*-hexane for recrystallization. The product was collected as an orange solid and dried under high vacuum (0.51 g, 60% yield). <sup>1</sup>H and <sup>13</sup>C NMR peaks were assigned through a combined analysis of <sup>1</sup>H NMR, <sup>13</sup>C NMR, <sup>1</sup>H, <sup>1</sup>H-gCOSY, gHSQCAD, and gHMBCAD spectroscopy. <sup>1</sup>H NMR (600 MHz, C<sub>6</sub>D<sub>6</sub>) δ 7.73 (d, *J* = 2.5 Hz, 2H, H15), 7.58 (s, 2H, H9), 7.05 – 7.03 (m, 4H, H17), 7.01 (d, *J* = 2.6 Hz, 2H, H13), 6.92 (t, *J* = 7.7 Hz, 4H, H18), 6.73 – 6.70 (m, 2H, H19), 3.72 – 3.58 (m, 2H, H4), 2.80 (q, *J* = 9.7 Hz, 4H, H1), 2.52 (*m*, 2H, H4), 1.80 (s, 18H), 1.38 (m, 2H, H3), 1.29 (s, 18H), 0.37 (m, 12H, H2). <sup>13</sup>C NMR (151 MHz, C<sub>6</sub>D<sub>6</sub>) δ 168.73 (C9), 158.41, 146.51 (C16), 140.54, 138.24, 129.68, 129.20, 127.99 (C18), 127.28 (C17), 123.62, 120.38 (C19), 69.00 (C1), 64.91 (C4), 35.42, 33.93, 31.25, 30.25, 27.30 (C3), 19.92 (C2), 19.57 (C2'). Elem. Anal. Calcd for C<sub>52</sub>H<sub>74</sub>N<sub>2</sub>O<sub>2</sub>Zr: C, 73.44; H, 8.77; N, 3.29; Found: C 73.27, H 8.86, N 3.41

### 4) Synthesis of the Complex $\text{Fl}_2\text{ZrMe}_2$ (3)

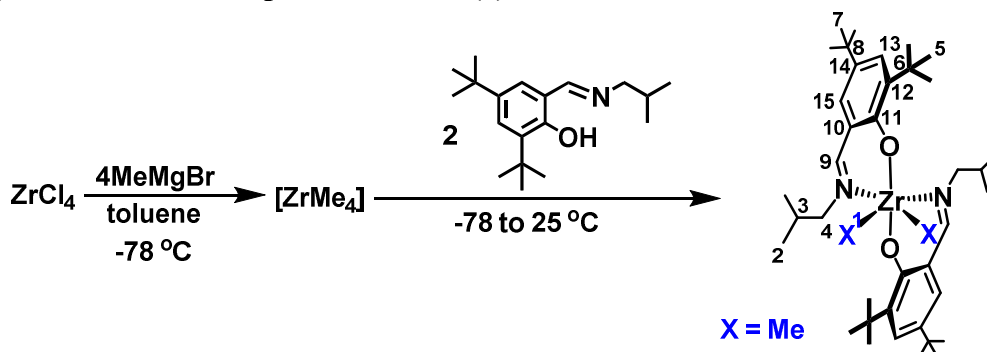

The complex was synthesized based on a modified literature procedure.<sup>3</sup> To a suspension of **ZrCl<sub>4</sub>** (0.466 g, 2.0 mmol, 1.0 equiv) in anhydrous toluene (60 mL) in a Schlenk flask at –78 °C

was added dropwise a solution of **MeMgBr** in diethyl ether (3.0 M, 2.8 mL, 8.4 mmol, 4.2 equiv). The resulting mixture was stirred at  $-78\text{ }^{\circ}\text{C}$  for an additional 30 min, and then a solution of **FI-H** ligand (1.156 g, 4.0 mmol, 2.0 equiv) in toluene (20 mL) was added slowly at  $-78\text{ }^{\circ}\text{C}$ . The resulting suspension was allowed to stir at  $-78\text{ }^{\circ}\text{C}$  for 2 h, and then the reaction mixture was allowed to warm to rt by removal of the cooling bath, to give a pale yellow mixture. After stirring at rt for an additional 1 h, all volatiles were removed under reduced pressure, and the residue was then extracted with toluene. Toluene was then removed under high vacuum to give a mixture, to which pentane was added. The precipitate was collected by filtration and dried under high vacuum to yield the product as a light yellow solid (0.89 g, 63% yield).  $^1\text{H}$  NMR (600 MHz,  $\text{C}_7\text{D}_8/\text{DFB} = 10/1$ , v/v,  $25\text{ }^{\circ}\text{C}$ )  $\delta$  7.83 (s, 2H, H9), 7.75 (d,  $J = 2.5\text{ Hz}$ , 2H), 7.12 (d,  $J = 2.5\text{ Hz}$ , 2H), 2.13 – 2.09 (m, 2H), 1.80 (s, 18H), 1.30 (s, 18H, ), 0.63 (s, 6H, H1), 0.50 (d,  $J = 6.6\text{ Hz}$ , 12H, H2).  $^{13}\text{C}$  NMR (151 MHz,  $\text{C}_7\text{D}_8/\text{DFB} = 10/1$ , v/v,  $25\text{ }^{\circ}\text{C}$ )  $\delta$  168.98 (C9), 159.44, 140.76, 139.70, 130.27, 129.27, 122.92, 69.92 (C4), 40.67 (C1), 35.87, 34.41, 31.61, 30.11, 28.33 (C3), 20.00 (C2, confirmed by HSQC). Elem. Anal. Calcd for  $\text{C}_{40}\text{H}_{66}\text{N}_2\text{O}_2\text{Zr}$ : C 68.81, H 9.53, N 4.01; Found: C 68.68, H 9.37, N 4.04

Due to significant broadening at  $25\text{ }^{\circ}\text{C}$ , the resonances corresponding to the  $\text{C}=\text{N}-\underline{\text{CH}_2}\text{CH}(\text{CH}_3)_2$  protons are not observable in the  $^1\text{H}$  NMR spectrum at this temperature. The stereochemically nonrigid coordination geometry of the two FI ligands<sup>4-7</sup> is the likely reason for the broadening of the  $\text{C}=\text{N}-\underline{\text{CH}_2}\text{CH}(\text{CH}_3)_2$  peaks. The  $^1\text{H}$  NMR of  $\text{C}=\text{N}-\text{CH}_2\underline{\text{CH}}(\text{CH}_3)_2$ , which is one carbon further from the imine, is not influenced. VT NMR spectroscopy was used to identify these peaks (**Figure S9**) in the temperature range 25 to  $-50\text{ }^{\circ}\text{C}$ . The complex is unstable at temperatures above  $25\text{ }^{\circ}\text{C}$  and undergoes significant decomposition during NMR data collection.

### 5) Synthesis of the Complex $\text{Fl}_2\text{ZrCl}_2$ (4)

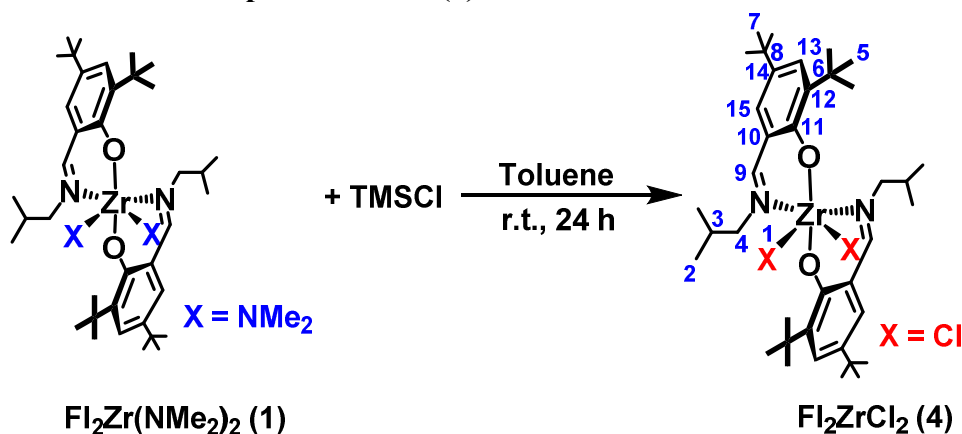

$\text{Fl}_2\text{Zr}(\text{NMe}_2)_2$  (1) (1.04 g, 1.4 mmol, 1.0 equiv) was dissolved in toluene (40 mL) in a 100-mL reaction flask. TMSCl (3.5 mL, 27.6 mmol, 19.7 equiv) was added via syringe at 25 °C. The solution was then stirred at rt for 24 h. All volatiles were then removed under reduced pressure and the resulting residue was washed with *n*-hexane. The resulting solid was dried under high vacuum and the product was collected as a yellow solid (0.73 g, 69% yield). Single crystals suitable for X-ray diffraction studies were grown from a solution of toluene at −40 °C. Complexes with similar structures were reported by Fujita et al.<sup>8</sup> exhibiting complicated patterns in the  $^1\text{H}$  NMR spectrum, likely due to the presence of isomers. The  $^1\text{H}$  and  $^{13}\text{C}$  peaks were assigned through a combined analysis of  $^1\text{H}$  NMR,  $^{13}\text{C}$  NMR,  $^1\text{H}$ ,  $^1\text{H}$ -gCOSY, gHSQCAD, and gHMBCAD spectroscopy.  $^1\text{H}$  NMR (600 MHz,  $\text{C}_6\text{D}_5\text{Cl}$ )  $\delta$  7.98 (s, 2H, H9), 7.75 (d,  $J$  = 2.5 Hz, 2H, H13), 7.23 (d,  $J$  = 2.5 Hz, 2H, H15), 3.44 (dd,  $J$  = 11.5, 5.7 Hz, 2H, H4), 2.99 (dd,  $J$  = 11.5, 9.0 Hz, 2H, H4'), 2.25 (m, 2H, H3), 1.70 (s, 18H), 1.27 (s, 18H, H5), 0.55 (m, 12H, H2);  $^{13}\text{C}$  NMR (151 MHz,  $\text{C}_6\text{D}_5\text{Cl}$ )  $\delta$  170.02 (C9), 157.92, 142.44, 139.40, 131.80, 129.09, 122.71, 69.84 (C4), 35.49, 34.28, 31.30, 30.02, 28.16 (C3), 20.39 (C2), 19.20 (C2'); Elem. Anal. Calcd for  $\text{C}_{38}\text{H}_{60}\text{Cl}_2\text{N}_2\text{O}_2\text{Zr}$ : C, 61.76; H, 8.18; N, 3.79; Found: C 61.58, H 8.08, N 3.64

### 6) Synthesis of the Complex $\text{FlAlMe}_2$ , Al (5)

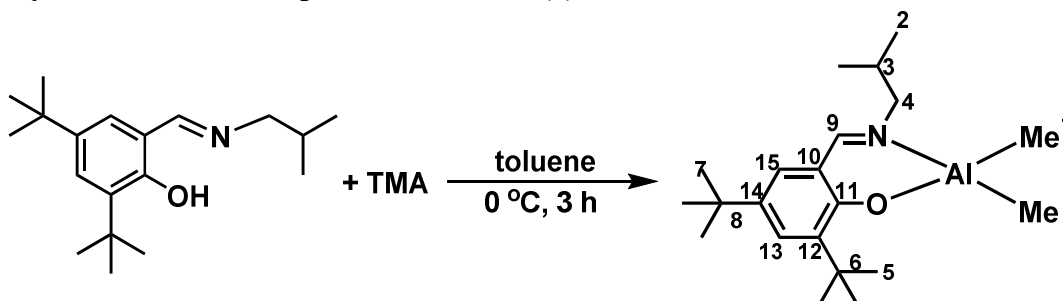

This complex was synthesized based on a modified literature procedure:<sup>9</sup> **FI-H** (0.63 g, 2.2 mmol) was dissolved in toluene (10 mL) in a 100-mL reaction flask. **TMA** (2.0 M in toluene) was added via syringe at 0 °C. The solution was then stirred at 0 °C for 1 h. All volatiles were then removed under reduced pressure and the resulting residue was recrystallized from pentane. The resulting solid was dried under high vacuum and the product was collected as a solid (0.34 g, 45% yield). Single crystals were obtained by cooling a pentane solution in freezer. <sup>1</sup>H NMR (600 MHz, C<sub>6</sub>D<sub>6</sub>) δ 7.79 (d, *J* = 2.6 Hz, 1H, H13), 7.39 (s, 1H, H9), 6.93 (d, *J* = 2.6 Hz, 1H, H15), 2.93 (d, *J* = 7.6 Hz, 2H), 2.07 – 1.99 (m, 1H, H3), 1.71 (s, 9H, H5), 1.42 (s, 9H, H7), 0.67 (d, *J* = 6.7 Hz, 6H, H2), -0.14 (s, 6H, H1). <sup>13</sup>C NMR (151 MHz, C<sub>6</sub>D<sub>6</sub>) δ 171.89 (C9), 162.12, 140.98, 138.95, 131.73 (C13), 128.86 (C15), 118.83, 66.04 (C4), 35.64 (C6), 34.17 (C8), 31.57 (C7), 29.65 (C5), 28.31 (C3), 19.92 (C2), -9.11 (C1, very weak signal and confirmed by HSQC experiment); Elem. Anal. Calcd for C<sub>21</sub>H<sub>36</sub>AlNO: C 73.00, H 10.50, N 4.05; Found: C 73.13, H 10.67, N 4.06

#### 7) Synthesis of the Complex FIZr(NMe<sub>2</sub>)<sub>3</sub> (6)

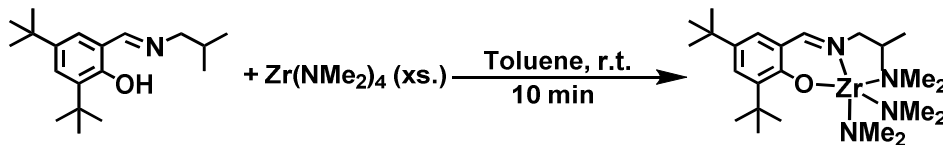

**Zr(NMe<sub>2</sub>)<sub>4</sub>** (6.77 g, 25.3 mmol, 3.1 equiv) was dissolved in toluene (20 mL) in a Schlenk flask. A solution of **FI-H** ligand (2.35 g, 8.13 mmol, 1.0 equiv) in toluene (30 mL) was then added slowly at rt over the course of 10 min. All volatiles were then removed under reduced pressure. Excess **Zr(NMe<sub>2</sub>)<sub>4</sub>** was removed by sublimation at 60 °C under high vacuum. The remaining crude product was purified by crystallization from a solution of pentane, dried under high vacuum, and the product was isolated as a yellow solid (3.4 g, 82% yield). Single crystals suitable for X-Ray diffraction studies were grown from slow evaporation of a pentane solution at rt. <sup>1</sup>H NMR (400 MHz, C<sub>6</sub>D<sub>6</sub>) δ 7.90 (s, 1H), 7.72 (d, *J* = 2.5 Hz, 1H), 7.16 (d, *J* = 2.4 Hz, 1H), 3.16 (d, *J* = 7.1 Hz, 2H), 3.08 (s, 18H), 1.83 (m, 1H), 1.66 (s, 9H), 1.36 (s, 9H), 0.72 (d, *J* = 6.7 Hz, 6H). <sup>13</sup>C NMR (101 MHz, C<sub>6</sub>D<sub>6</sub>) δ 169.33, 160.78, 139.97, 139.74, 129.45, 128.93, 121.71, 70.36, 42.85, 35.67, 34.33, 31.76, 29.75, 28.30, 20.76. Elem. Anal. Calcd for C<sub>25</sub>H<sub>48</sub>N<sub>4</sub>OZr: C 58.66, H 9.45, N 10.94; Found: C 58.43, H 9.32, N 10.74

#### 8) Synthesis of the Complex Al<sub>2</sub>(NMe<sub>2</sub>)<sub>2</sub>Me<sub>4</sub>



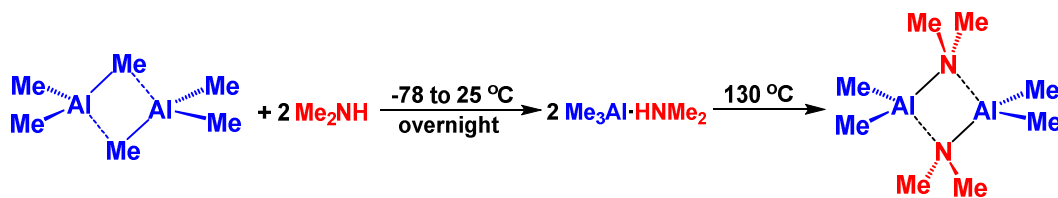

This complex was synthesized based on a modified literature procedure.<sup>10</sup> To **Me<sub>2</sub>NH** (10 mmol, 2.0 M in THF, 5 mL) in a Schlenk flask at  $-78\text{ }^{\circ}\text{C}$  was added dropwise **trimethylaluminum (TMA)**, 10 mmol, 2.0 M in toluene, 5 mL). The resulting mixture was stirred at  $-78\text{ }^{\circ}\text{C}$  for an additional 30 min, and then let it warm to  $25\text{ }^{\circ}\text{C}$  for overnight reaction. All volatiles were removed under high vacuum to give white powder, <sup>1</sup>H NMR confirms the structure of Me<sub>3</sub>Al·HNMe<sub>2</sub>. <sup>1</sup>H NMR (499 MHz, C<sub>6</sub>D<sub>6</sub>)  $\delta$  1.51 (m, 6H), 0.68 (br, 1H), 0.57 (s, 9H). Under argon, the white powder was put in a schlenk flask and heated at  $130\text{ }^{\circ}\text{C}$  until no gas evolution (CH<sub>4</sub>, about 1 h). The resulting white needle-like product was also sublimed inside the top of the Schlenk flask which is the desired product Al<sub>2</sub>(NMe<sub>2</sub>)<sub>2</sub>Me<sub>4</sub>, 0.73 g, 73% yield. <sup>1</sup>H NMR confirms the structure.<sup>10</sup> <sup>1</sup>H NMR (600 MHz, C<sub>6</sub>D<sub>6</sub>)  $\delta$  2.06 (s, 12H), 0.57 (s, 12H).

### Polymerization Experiments (Table 1 in the manuscript)

**Preparation of catalyst solutions.** Catalyst solutions were prepared immediately prior to use. The procedures for preparing catalyst solutions: In a glovebox, 10  $\mu\text{mol}$  of catalyst was dissolved in 8 mL of toluene in a Schlenk flask. The Schlenk flask was then removed from the glovebox, connected to a Schlenk line, and the appropriate amount of TMA was added via syringe under argon. The catalyst solution was next stirred for 30 min and then 12  $\mu\text{mol}$  of cocatalyst BT (6.0 mM in toluene, 2 mL) was added via syringe. The solution was stirred for 1 min before injecting into the reactor to initiate polymerization.

**Ethylene/1-octene copolymerization procedure.** In a typical experiment, a 350-mL oven dried glass pressure vessel (350 mL, CG1880-42, Chemglass) equipped with a large stir bar was charged with dry toluene (45 mL) and 1-octene (3.58 g) inside a glovebox. The pressure vessel was sealed, removed from the glovebox, and attached to a high-pressure/high-vacuum line. The mixture was cooled to  $-78\text{ }^{\circ}\text{C}$  in a dry ice/acetone bath, degassed, filled with ethylene gas, sealed, and then allowed to warm to the required temperature with an external bath. A solution of catalyst/cocatalyst was quickly injected into the flask with rapid stirring using a gas-tight syringe equipped with a flattened spraying needle under argon. The reactor was pressurized with the

required pressure of ethylene. After the required reaction time, the polymerization was quenched with methanol. The reactor was then vented, and the polymerization mixture was quenched with 10% HCl in methanol. The precipitated polymer was stirred for several hours, collected by filtration, and washed with methanol. It was then dried under high vacuum at 80 °C overnight until a constant weight was obtained.

### **Polymerization Experiments (Table 2 in the manuscript)**

**Ethylene-1-octene copolymerization.** A 2-liter Parr reactor was used in the polymerizations. All feeds were passed through columns of alumina and Q-5<sup>TM</sup> catalyst (available from Engelhard Chemicals Inc.) prior to introduction into the reactor.<sup>1</sup> The stirred 2-liter reactor was charged with about 609 g of mixed alkanes solvent (Isopar E) and 300 g of 1-octene comonomer. The reactor contents were heated to the polymerization temperature of 120 °C. Once at temperature, the reactor was saturated with ethylene at 270 psig. Precatalysts and trityl borate activator, as 5 mM and 6 mM solutions in toluene, respectively, were mixed in a glovebox at room temperature and transferred directly to a catalyst addition tank through stainless steel tubing and injected into the reactor with a nitrogen overpressure. In some polymerizations the precatalyst was mixed with trimethylaluminum for either less than two min or for at least 30 min before trityl borate was added and the activated solution was added to the reactor. The polymerization conditions were maintained for up to 10 min with ethylene added on demand. Heat was continuously removed from the reaction vessel through an internal cooling coil. The resulting solution was removed from the reactor, quenched with isopropyl alcohol, and stabilized by addition of 10 mL of a toluene solution containing approximately 67 mg of a hindered phenol antioxidant (Irganox<sup>TM</sup> 1010 from Ciba Geigy Corporation) and 133 mg of a phosphorus stabilizer (Irgafos<sup>TM</sup> 168 from Ciba Geigy Corporation). Between polymerization runs, a wash cycle was conducted in which 850 g of mixed alkanes (Isopar E) were added to the reactor and the reactor was heated to 150 °C. The reactor was then emptied of the heated solvent immediately before beginning a new polymerization run. Polymers were recovered by drying for about 12 h in a temperature-ramped vacuum oven with a final set point of 140 °C.

## NMR Spectra of the Ligand and Complexes

### 1) FI-H Ligand

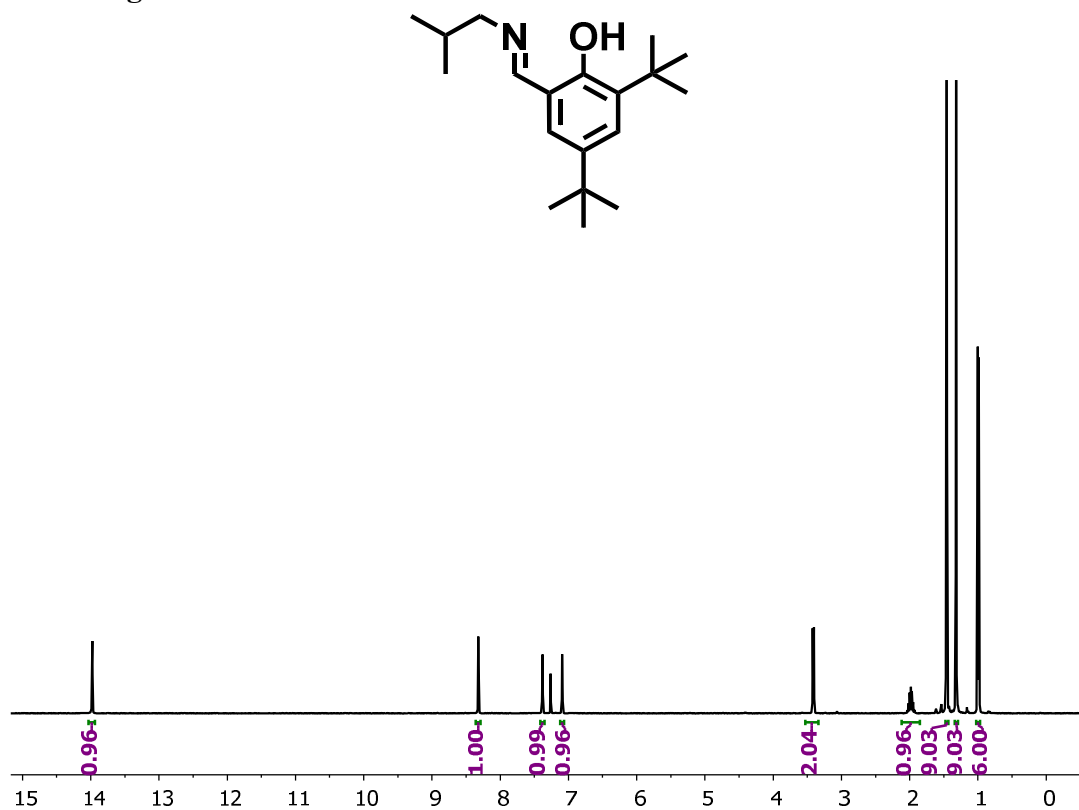

**Figure S1.**  $^1\text{H}$  NMR spectrum (400 MHz) of **Ligand FI-H** in  $\text{CDCl}_3$ .

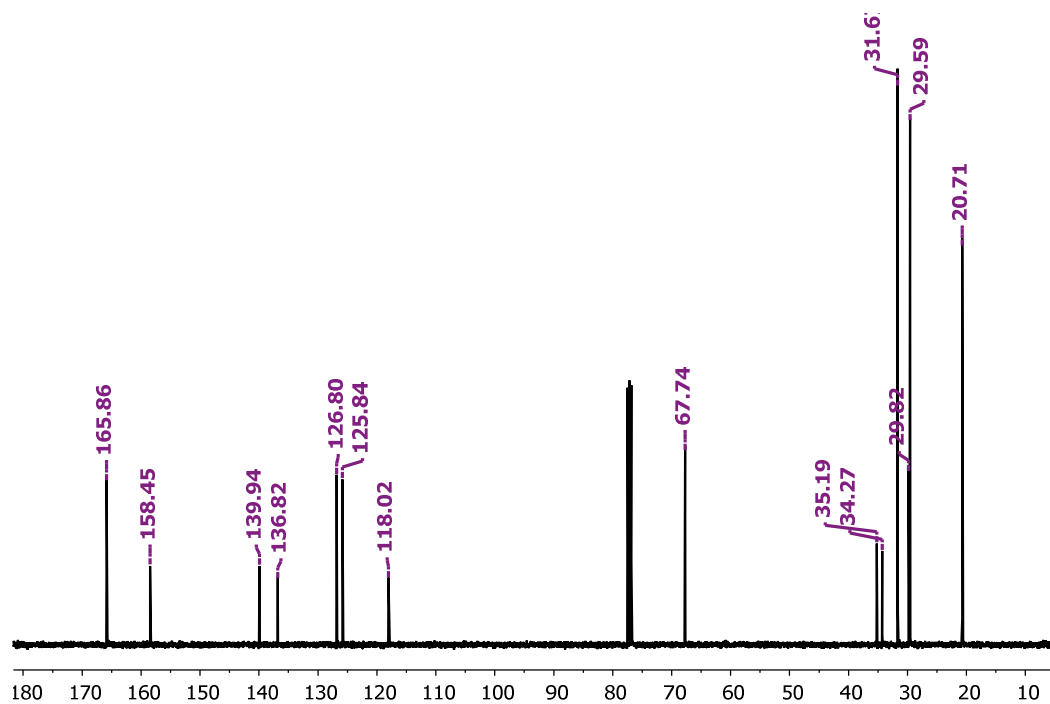

Figure S2. <sup>13</sup>C NMR spectrum (101 MHz) of Ligand FI-H in CDCl<sub>3</sub>.

2) Complex FI<sub>2</sub>Zr(NMe<sub>2</sub>)<sub>2</sub> (1)

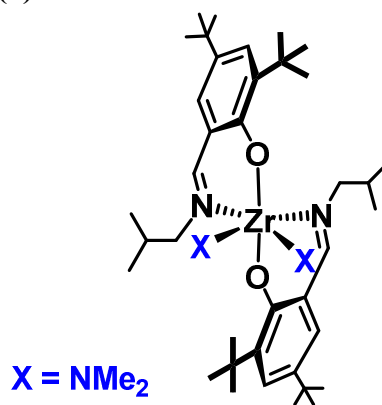

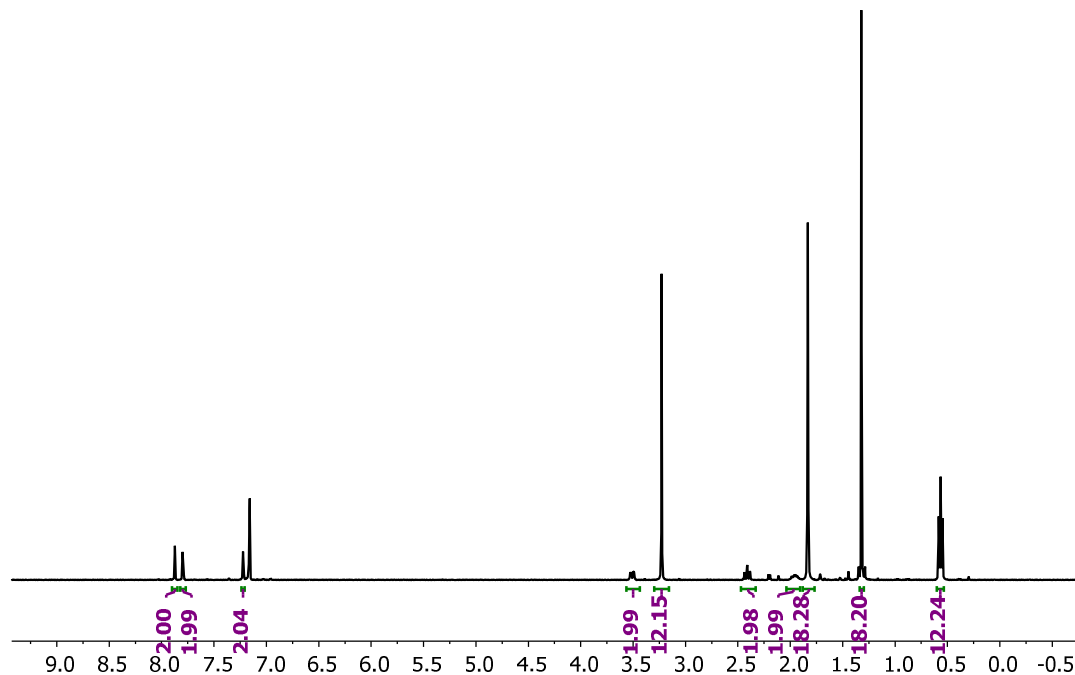

**Figure S3.** <sup>1</sup>H NMR spectrum (400 MHz) of complex **FI<sub>2</sub>Zr(NMe<sub>2</sub>)<sub>2</sub>** (**1**) (C<sub>6</sub>D<sub>6</sub>, 25 °C).

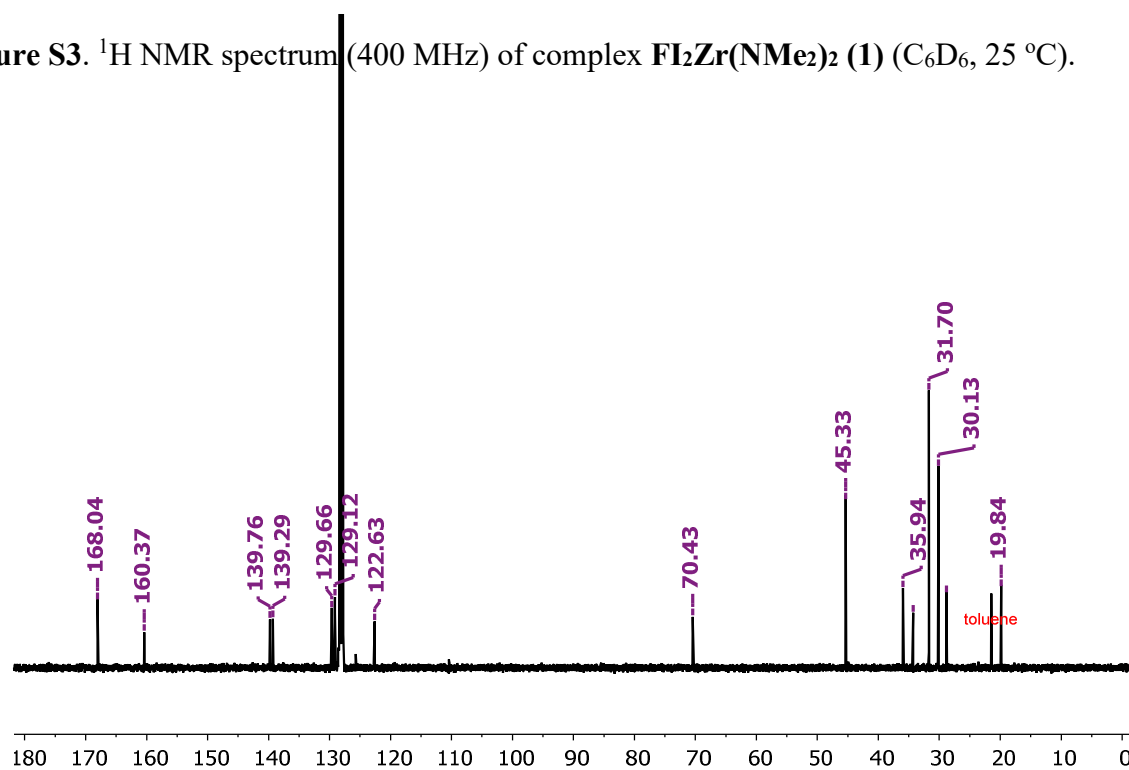

**Figure S4.** <sup>13</sup>C NMR spectrum (101 MHz) of complex **FI<sub>2</sub>Zr(NMe<sub>2</sub>)<sub>2</sub>** (**1**) (C<sub>6</sub>D<sub>6</sub>, 25 °C).

### 3) Complex $\text{Fl}_2\text{ZrBn}_2$ (**2**)

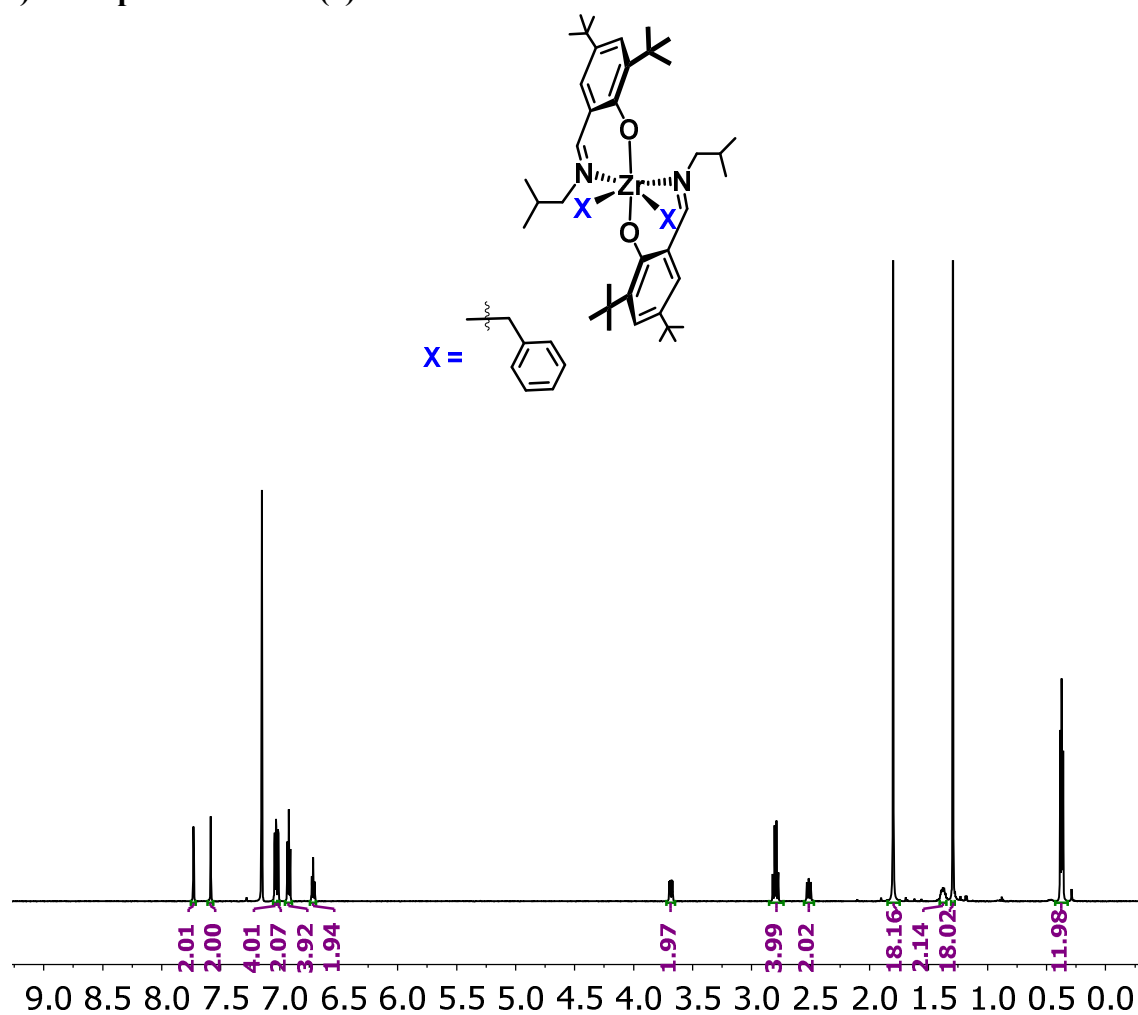

**Figure S5.**  $^1\text{H}$  NMR spectrum (600 MHz) of complex  $\text{Fl}_2\text{ZrBn}_2$  (**2**) ( $\text{C}_6\text{D}_6$ , 25 °C).

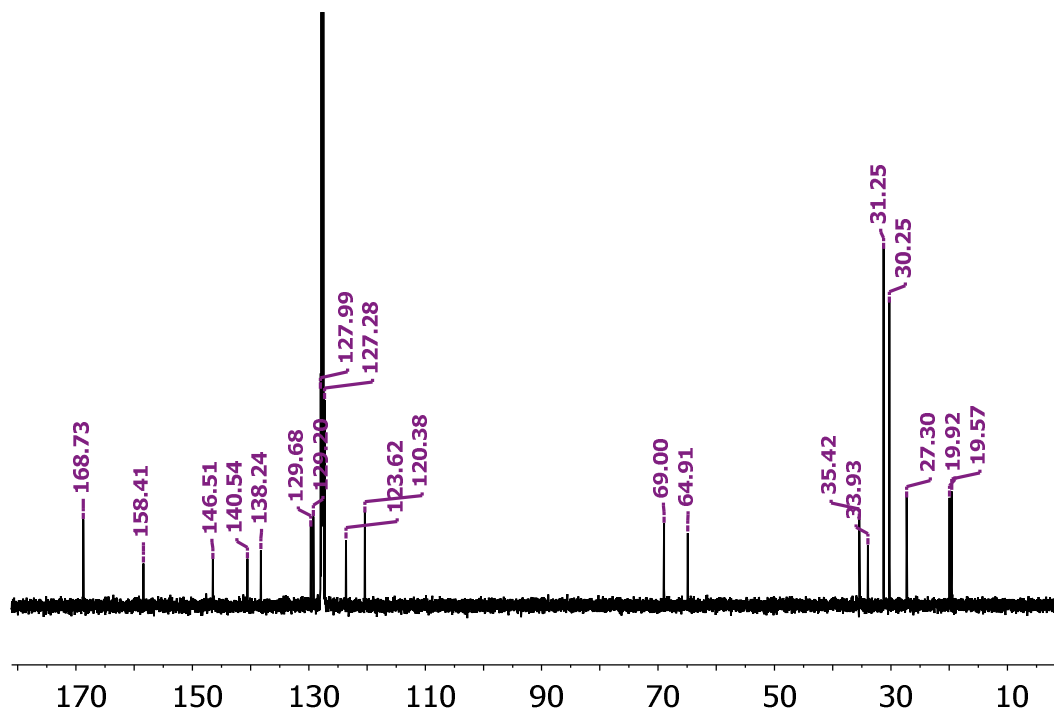

Figure S6.  $^{13}\text{C}$  NMR spectrum (151 MHz) of complex **FI<sub>2</sub>ZrBn<sub>2</sub>** (**2**) ( $\text{C}_6\text{D}_6$ , 25 °C).

#### 4) Complex FI<sub>2</sub>ZrMe<sub>2</sub> (**3**)

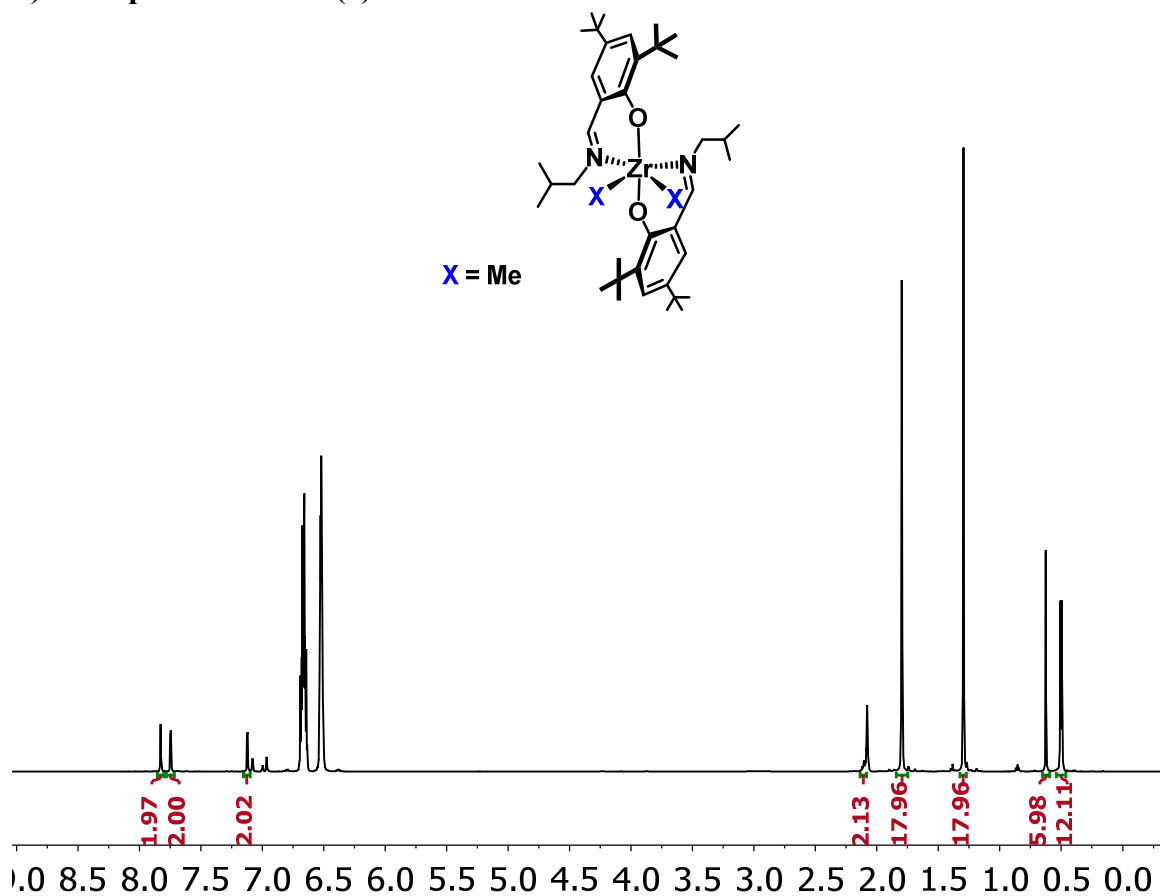

Figure S7.  $^1\text{H}$  NMR spectrum (600 MHz) of complex **FI<sub>2</sub>ZrMe<sub>2</sub>** (**3**) ( $\text{C}_7\text{D}_8/\text{DFB} = 10/1$ , v/v, 25 °C)

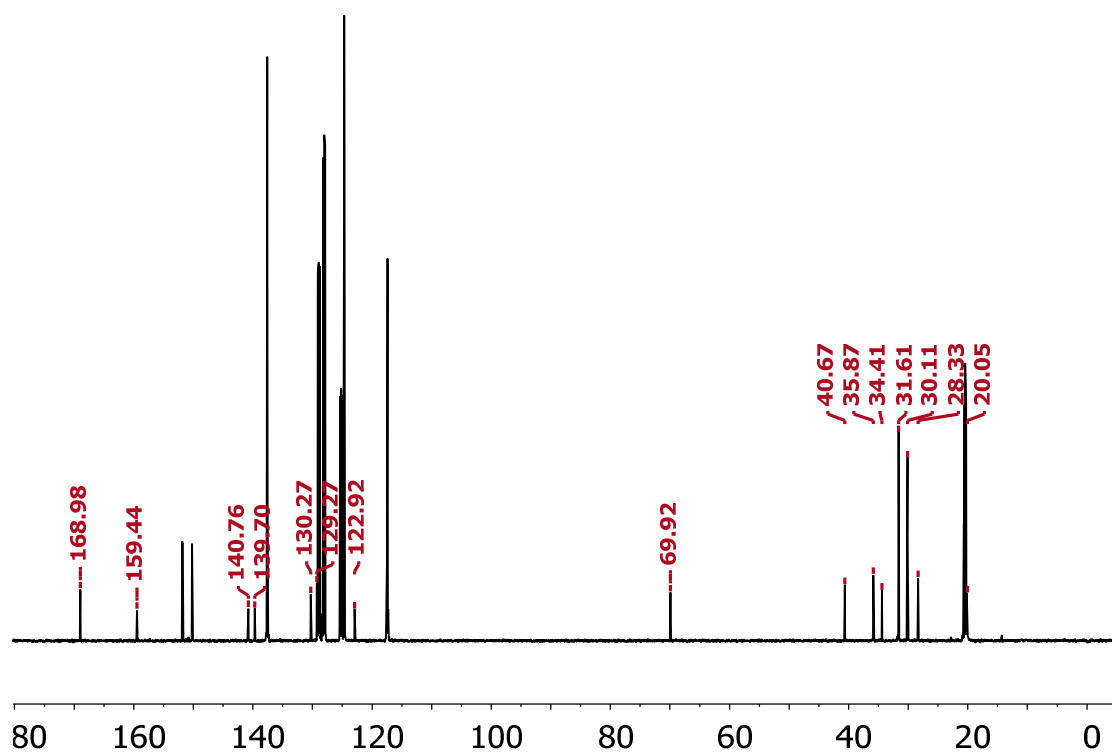

**Figure S8.**  $^{13}\text{C}$  NMR spectrum (151 MHz) of complex **FI<sub>2</sub>ZrMe<sub>2</sub> (3)** ( $\text{C}_7\text{D}_8/\text{DFB} = 10/1$ , v/v, 25 °C)

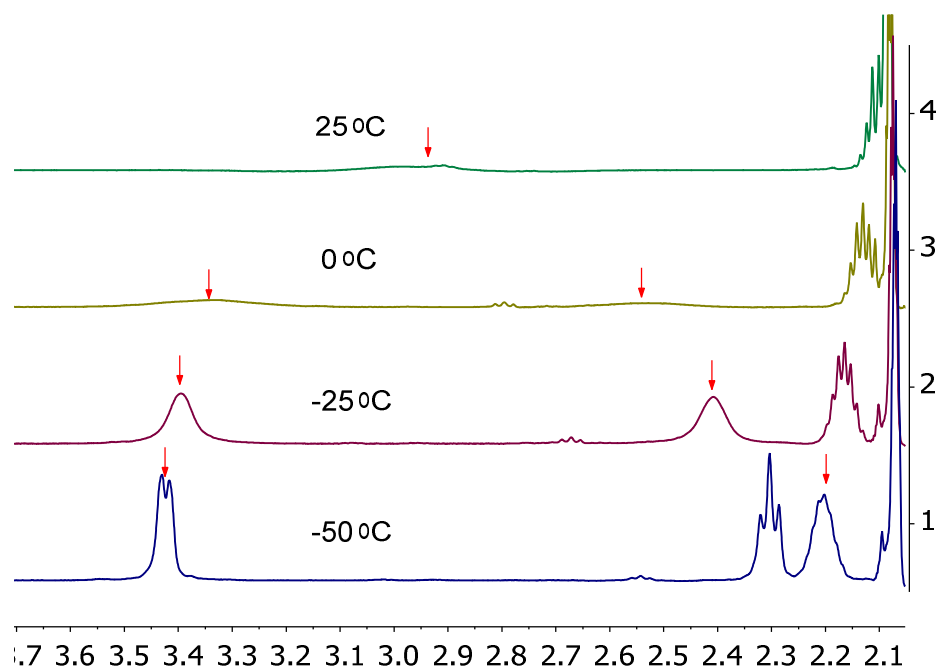

**Figure S9.** A section of VT  $^1\text{H}$  NMR spectrum(600 MHz) of complex **FI<sub>2</sub>ZrMe<sub>2</sub> (3)** ( $\text{C}_7\text{D}_8/\text{DFB} = 10/1$ , v/v)



5) Complex  $\text{Fl}_2\text{ZrCl}_2$  (**4**)

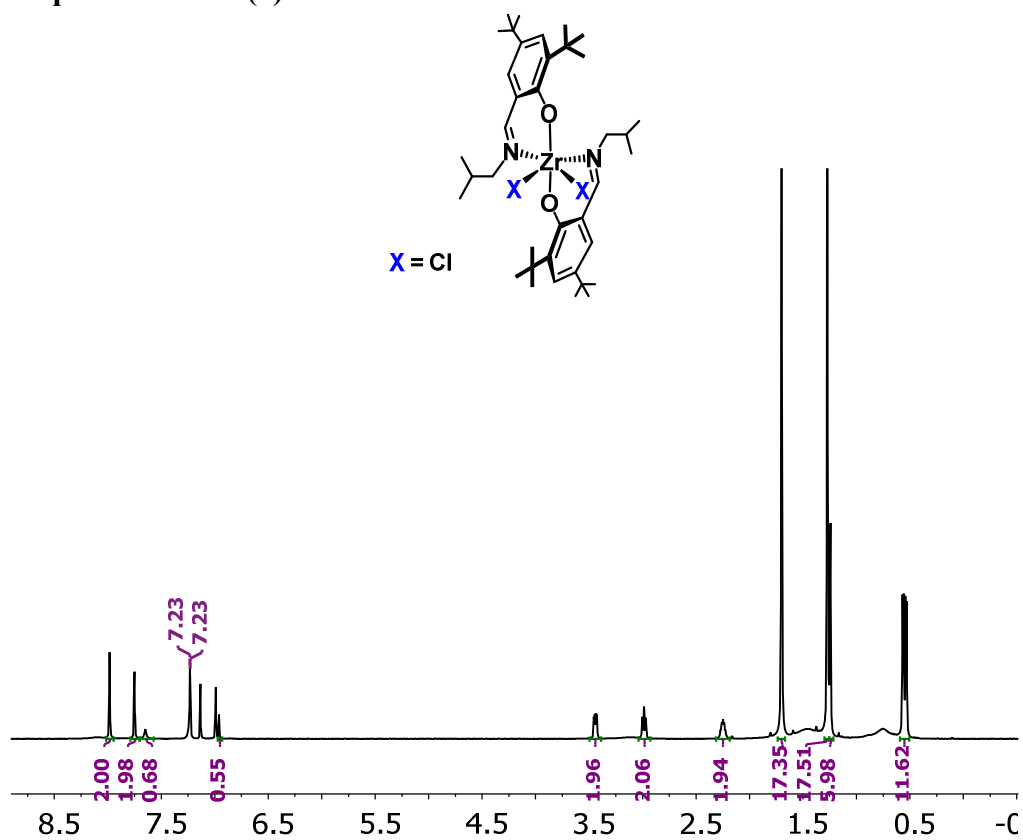

Figure S10.  $^1\text{H}$  NMR spectrum (600 MHz) of  $\text{Fl}_2\text{ZrCl}_2$  (**4**) ( $\text{CDCl}_3$ , 25 °C).

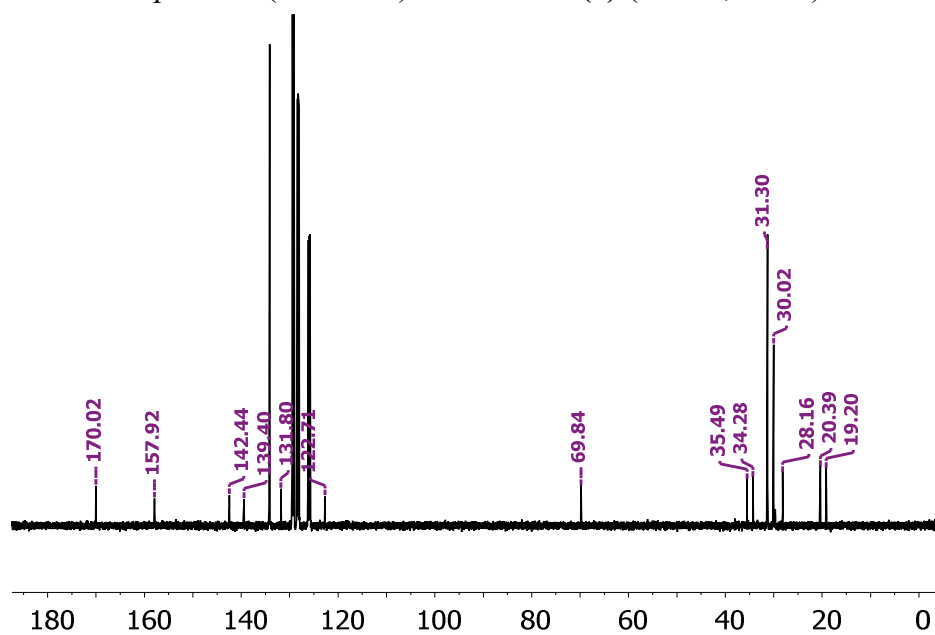

Figure S11.  $^{13}\text{C}$  NMR spectrum (151 MHz) of  $\text{Fl}_2\text{ZrCl}_2$  (**4**) ( $\text{CDCl}_3$ , 25 °C).

6) Complex **FIAlMe<sub>2</sub>** (**5**)

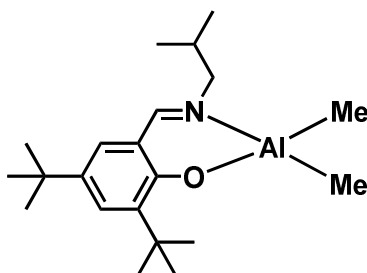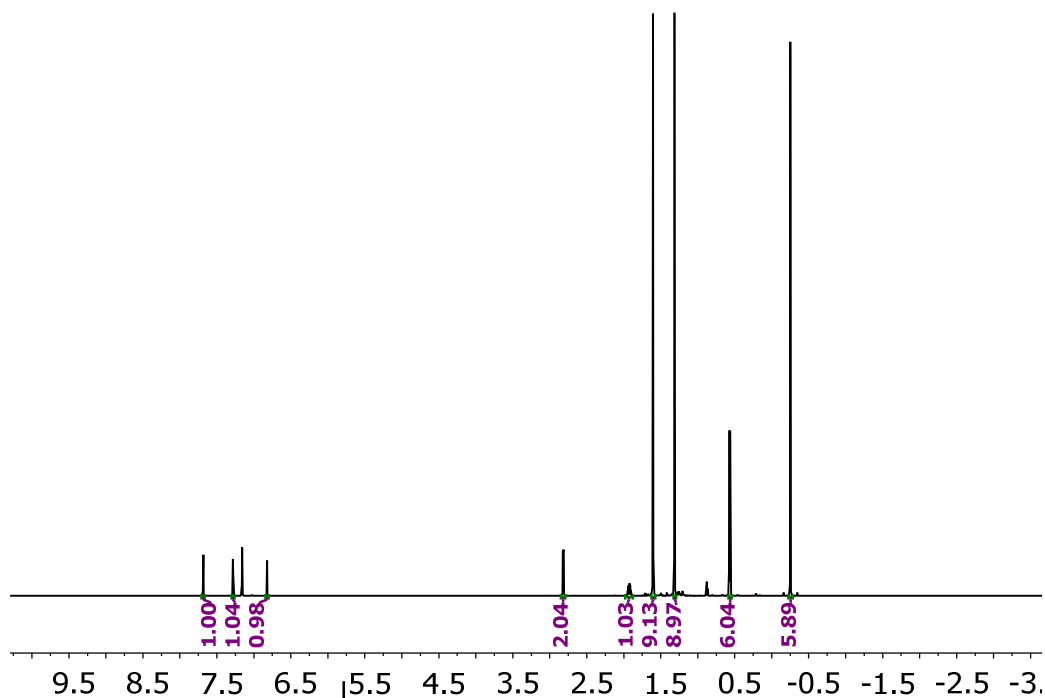

**Figure S12.** <sup>1</sup>H NMR spectrum (600 MHz) of complex **FIAlMe<sub>2</sub>** (**5**) (C<sub>6</sub>D<sub>6</sub>, 25 °C)

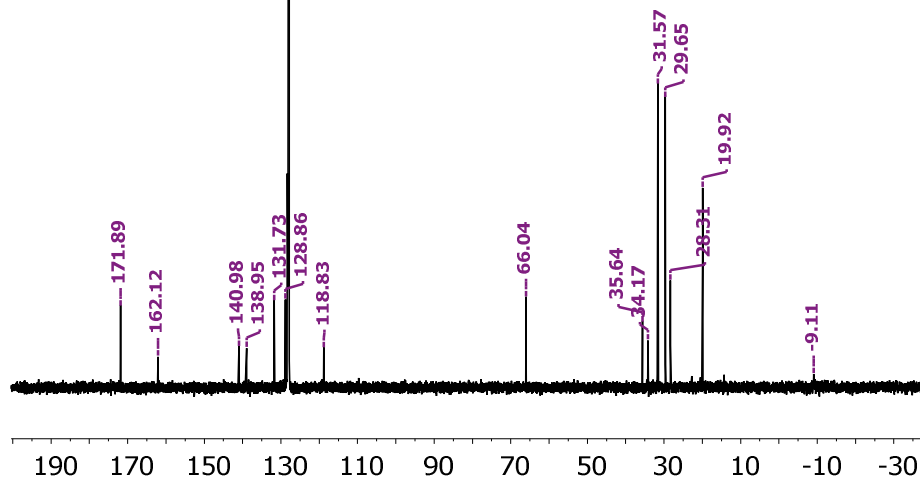

**Figure S13.** <sup>13</sup>C NMR spectrum (151 MHz) of complex **FIAlMe<sub>2</sub>** (**5**) (C<sub>6</sub>D<sub>6</sub>, 25 °C)

7) Complex  $\text{FIZr}(\text{NMe}_2)_3$  (**6**)

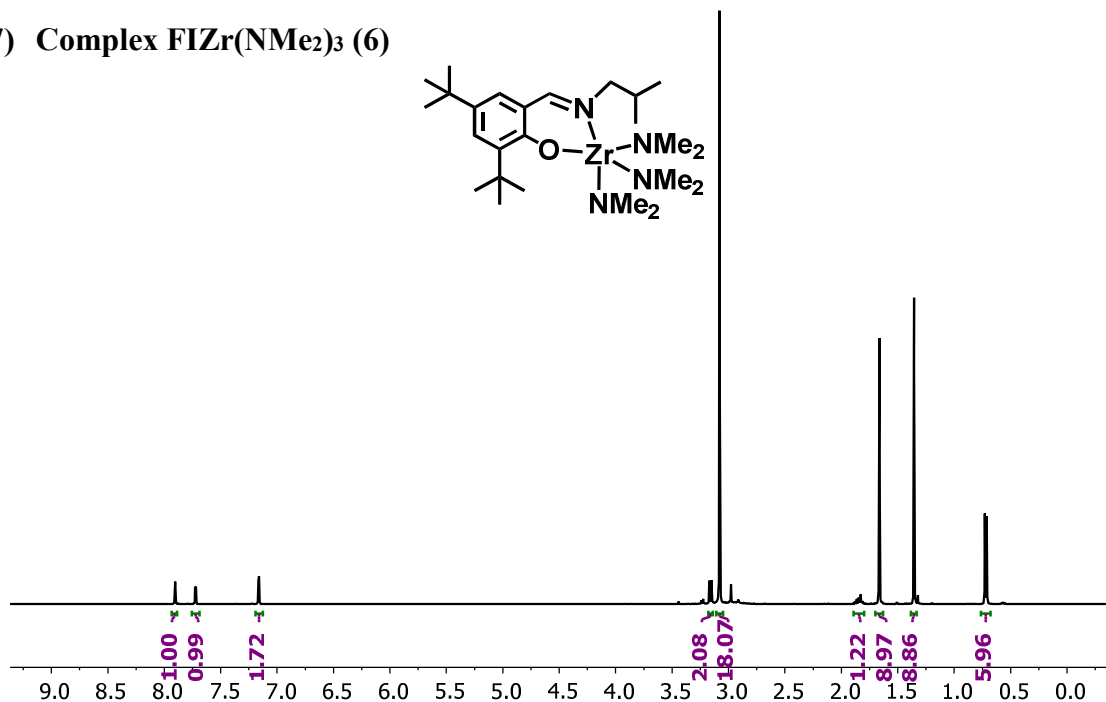

Figure S14.  $^1\text{H}$  NMR spectrum (400 MHz) complex  $\text{FIZr}(\text{NMe}_2)_3$  (**6**) ( $\text{C}_6\text{D}_6$ , 25 °C)

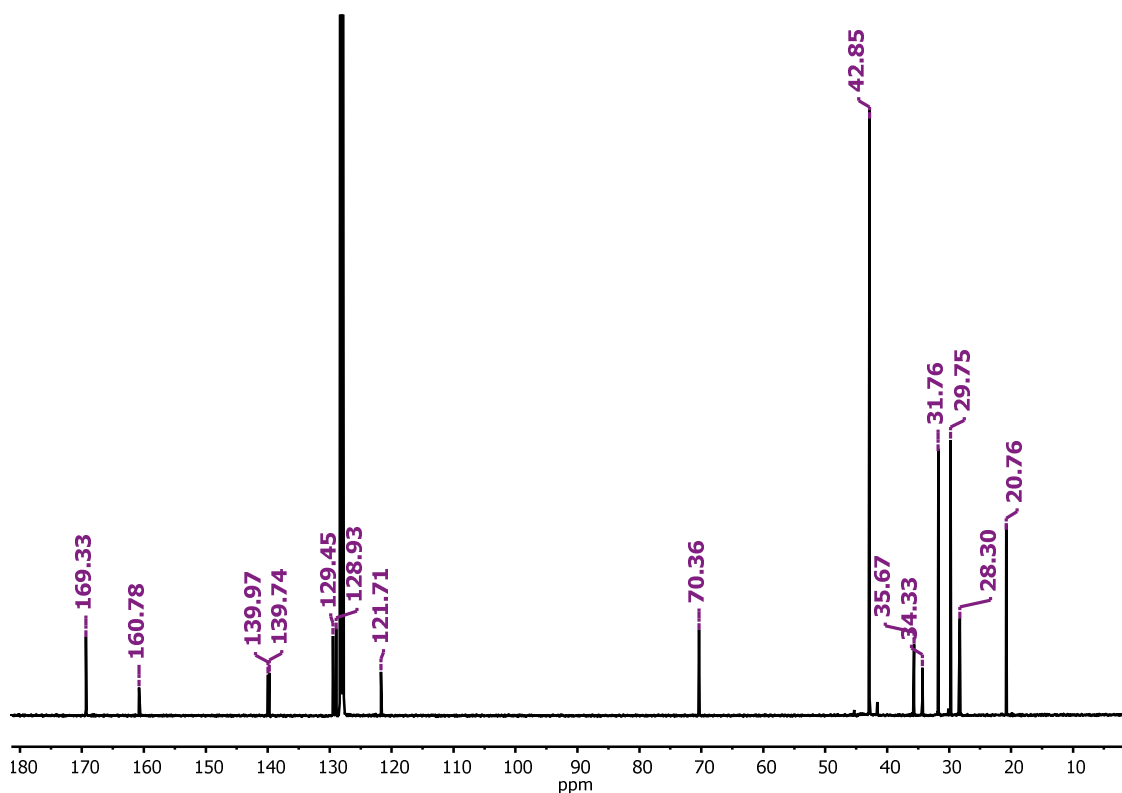

Figure S15.  $^{13}\text{C}$  NMR spectrum (101 MHz) of complex  $\text{FIZr}(\text{NMe}_2)_3$  (**6**) ( $\text{C}_6\text{D}_6$ , 25 °C)

8) Complex  $\text{Me}_3\text{Al}\cdot\text{HNMe}_2$

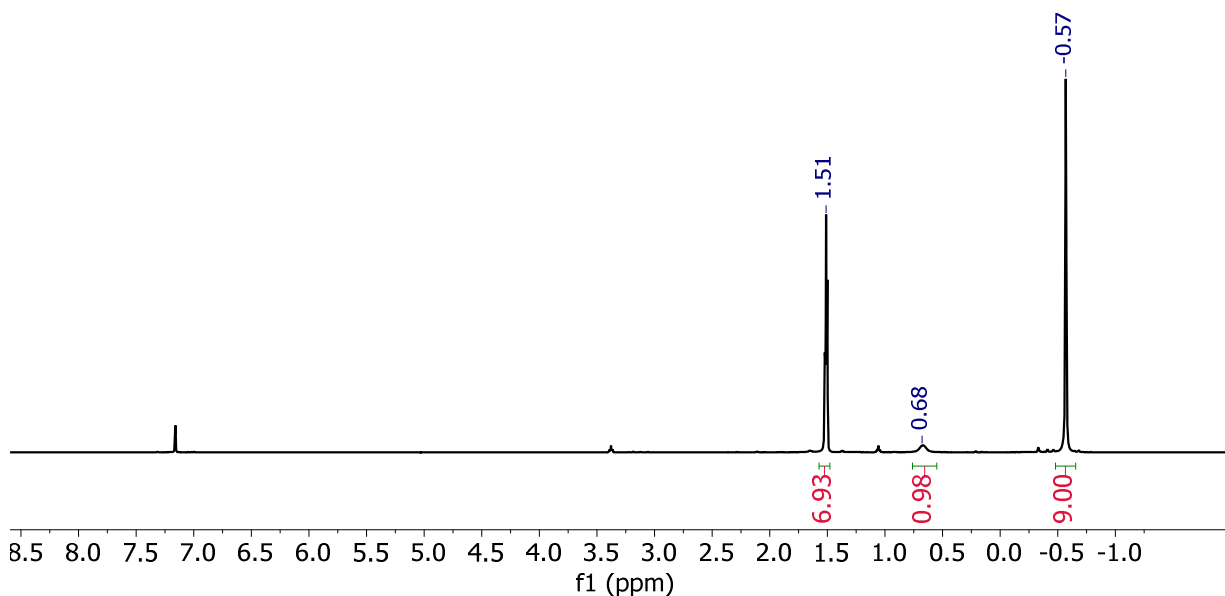

**Figure S16.**  $^1\text{H}$  NMR spectrum (499 MHz) complex  $\text{Me}_3\text{Al}\cdot\text{HNMe}_2$  ( $\text{C}_6\text{D}_6$ , 25  $^\circ\text{C}$ )

#### 9) Complex $\text{Al}_2(\text{NMe}_2)_2\text{Me}_4$

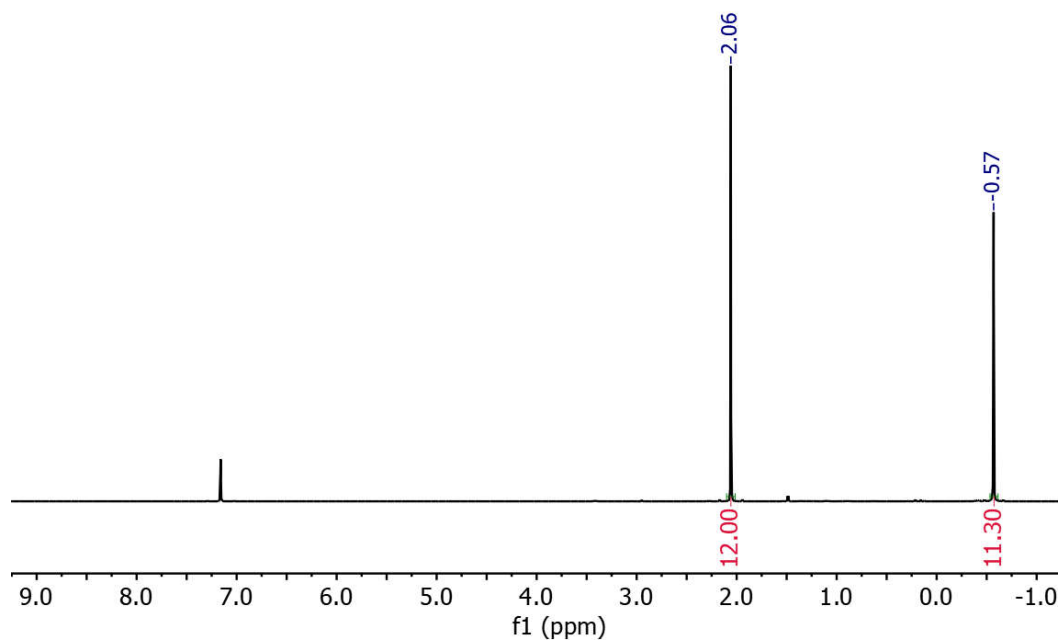

**Figure S17.**  $^1\text{H}$  NMR spectrum (600 MHz) complex  $\text{Al}_2(\text{NMe}_2)_2\text{Me}_4$  ( $\text{C}_6\text{D}_6$ , 25  $^\circ\text{C}$ )

#### NMR Studies of Precatalyst Activation Chemistry

To better understand the precatalyst alkylation/activation process, the following experiments were carried out and their NMR spectra were analyzed.

### 1) Reaction of $\text{FI}_2\text{ZrMe}_2$ (**3**) + BT

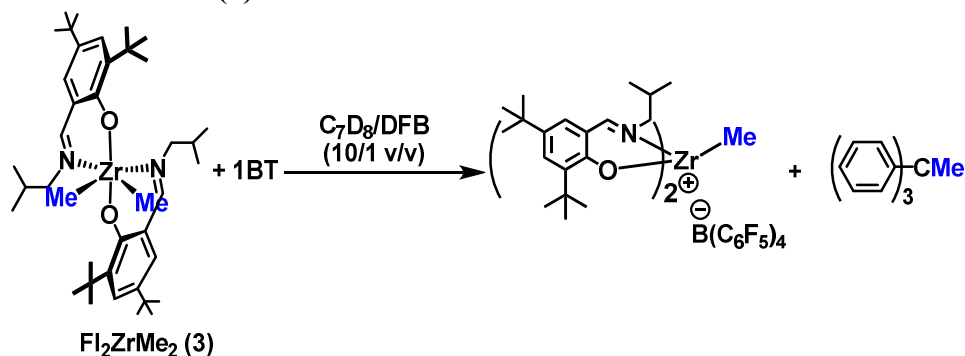

Procedure: In a glovebox,  $\text{FI}_2\text{ZrMe}_2$  (**3**) (14.0 mg, 20  $\mu\text{mol}$ , 1.0 equiv), BT (18.4 mg, 20  $\mu\text{mol}$ , 1.0 equiv),  $\text{C}_7\text{D}_8$  (0.472 g, 0.5 mL) and DFB (0.058 g, 0.05 mL) were added to a vial. The vial was capped and the mixture was shaken for 1 min, the solution was then transferred into an NMR tube equipped with Precision Seal® rubber septum cap, and removed from the glovebox immediately in order to perform NMR experiments.

This reaction affords the cationic species  $\text{FI}_2\text{ZrMe}^+\text{B}(\text{C}_6\text{F}_5)_4^-$  quantitatively, as confirmed by NMR spectroscopy (**Figure S18**).  $^1\text{H}$  NMR of  $\text{FI}_2\text{ZrMe}^+\text{B}(\text{C}_6\text{F}_5)_4^-$  (600 MHz,  $\text{C}_7\text{D}_8/\text{DFB}$  = 10/1, v/v, 25 °C)  $\delta$  8.01 (s, 2H), 7.80 (d,  $J$  = 2.5 Hz, 2H), 7.25 (d,  $J$  = 2.5 Hz, 2H), 3.63 (s, 4H), 1.66 (m, 2H), 1.43 (s, 18H), 1.25 (s, 18H), 1.10 (s, 3H, Zr-Me, confirmed by HSQC), 0.68 (d,  $J$  = 6.6 Hz, 12H).

After standing at 25 °C for 3 h, approx 32% decomposition was observed. In the calculation,  $\text{Ph}_3\text{C}-\underline{\text{Me}}$  is used as an internal reference (peak **A**), peak **B** for  $\text{C}=\text{NCH}_2\text{CH}(\underline{\text{CH}_3})_2$  is used to represent the cationic species (**Figure S19**).

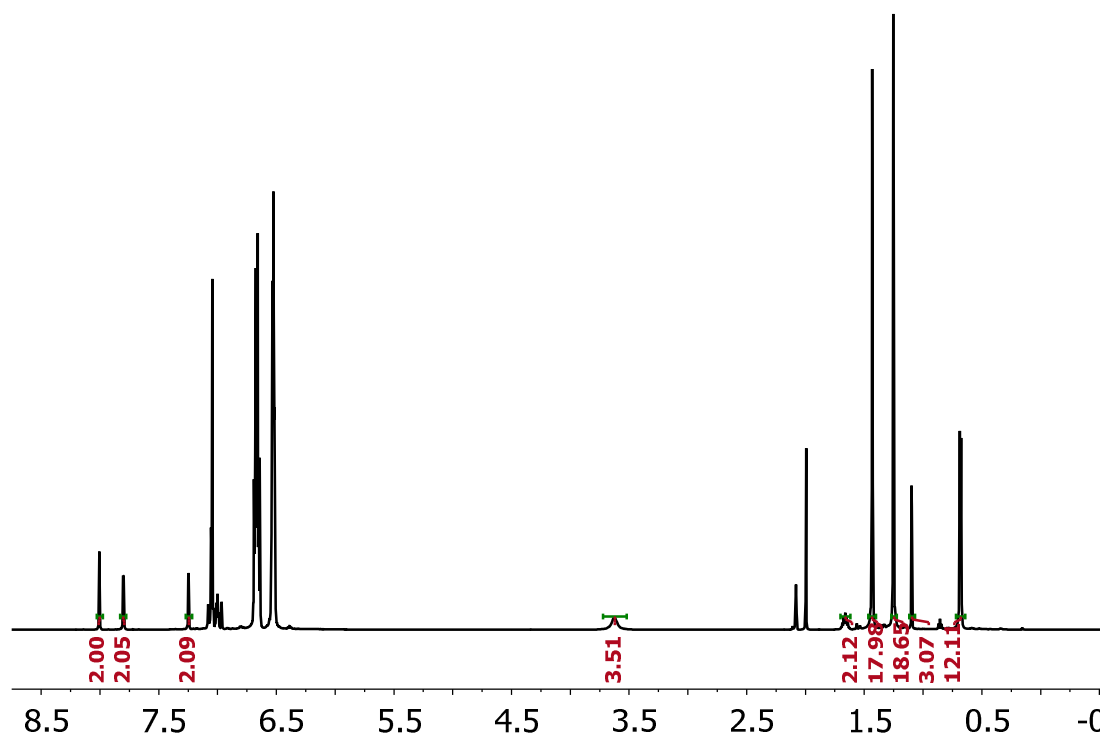

**Figure S18.**  $^1\text{H}$  NMR spectrum (600 MHz) of cationic species,  $\text{Fl}_2\text{ZrMe}^+\text{B}(\text{C}_6\text{F}_5)_4^-$  ( $\text{C}_7\text{D}_8/\text{DFB}$  = 10/1,  $v/v$ , 25 °C).

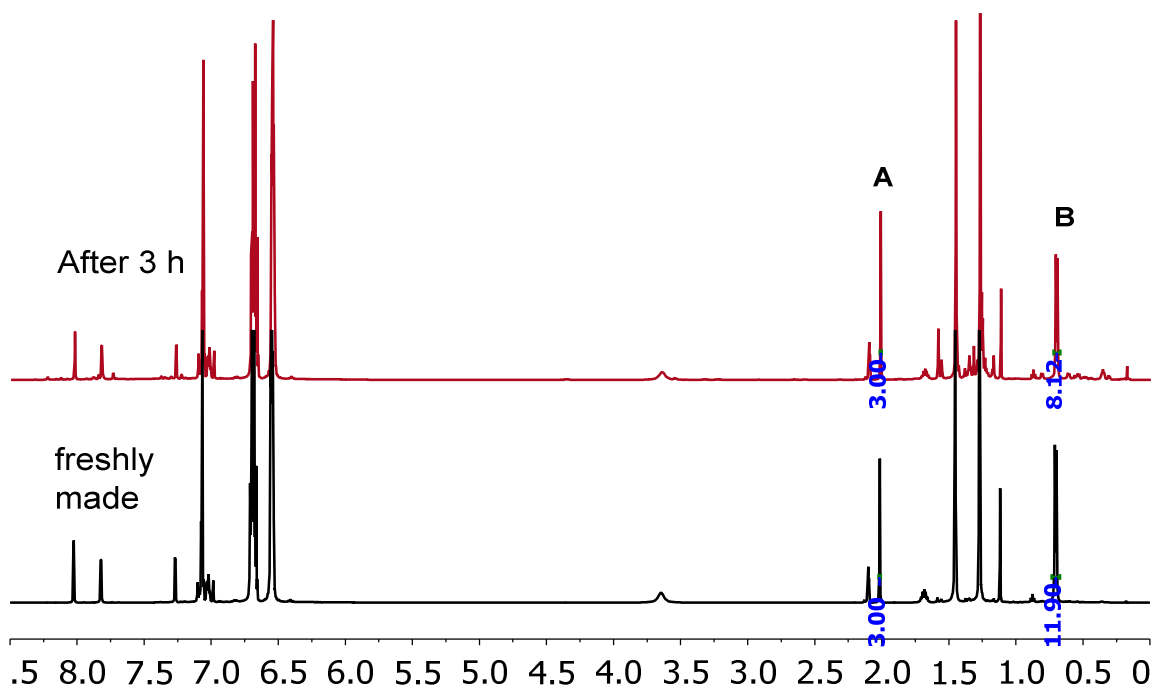

**Figure S19.** Decomposition over time. Comparison of  $^1\text{H}$  NMR spectra of cationic species,  $\text{Fl}_2\text{ZrMe}^+\text{B}(\text{C}_6\text{F}_5)_4^-$  ( $\text{C}_7\text{D}_8/\text{DFB}$  = 10/1,  $v/v$ , 25 °C), freshly made vs. after 3 h at rt. Peak A for

Ph<sub>3</sub>C-*Me* is used as an internal reference, peak **B** for C=NCH<sub>2</sub>CH(*CH*<sub>3</sub>)<sub>2</sub> is used to represent the cationic species, **FI<sub>2</sub>ZrMe<sup>+</sup>B(C<sub>6</sub>F<sub>5</sub>)<sub>4</sub><sup>-</sup>**.

2) Reaction of FI<sub>2</sub>ZrMe<sub>2</sub> (**3**) + BT + TMA to give FI<sub>2</sub>Zr<sup>+</sup>(μ-Me)<sub>2</sub>AlMe<sub>2</sub> B(C<sub>6</sub>F<sub>5</sub>)<sub>4</sub><sup>-</sup> (**7**)

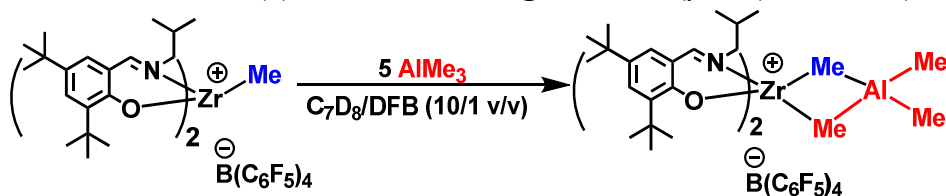

Proposed based on NMR

Procedure: In a glovebox, **FI<sub>2</sub>ZrMe<sub>2</sub> (3)** (14.0 mg, 20 μmol, 1.0 equiv), BT (18.4 mg, 20 μmol, 1.0 equiv), C<sub>7</sub>D<sub>8</sub> (0.472 g, 0.5 mL) and DFB (0.058 g, 0.05 mL) were added to a vial. The vial was capped and the mixture was shaken for 1 min, the solution was then transferred into an NMR tube equipped with Precision Seal® rubber septum cap, and removed from the glovebox immediately. To the solution in the NMR tube was added a solution of TMA in toluene (0.05 mL, 0.1 mmol, 5.0 equiv/Zr catalyst) immediately before performing NMR experiments. The cationic species was seen to decompose within 3 h, as indicated by color change from yellow to a dark red, as well as indecipherable peaks present in the NMR spectra. Thus, the NMR experiments were carried out at −50 °C to minimize cationic species decomposition (additionally, low temperature NMR minimizes line broadening caused by fluxional coordination of the **FI** ligand to Zr).

The product and other species in the reaction mixture were identified, and thus the structure of **[Zr⋯Al](7)** is proposed based on <sup>1</sup>H NMR (**Figure S20**) and HSQC (**Figure S21**) spectra. An overlapping peak is observed with the bridging methyl group signal, Zr(μ-Me)<sub>2</sub>AlMe<sub>2</sub>. However, these peaks can be differentiated by HSQC (**Figure S21**). The corresponding chemical shifts are δ 0.95 ppm (<sup>1</sup>H NMR) and 14.4 ppm (<sup>13</sup>C NMR). The overlapping peak was identified as an impurity in the commercial TMA solution, as confirmed by control NMR experiments (**Figure S22**).

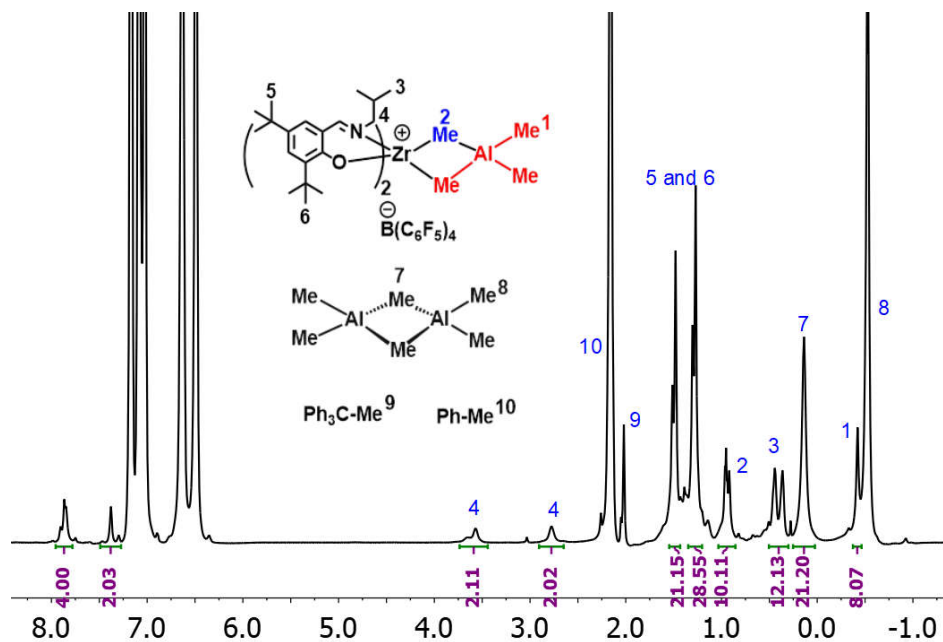

**Figure S20.**  $^1\text{H}$  NMR spectra (600 MHz) of *in situ* generated  $[\text{Zr-Al}](7)$  ( $\text{C}_7\text{D}_8/\text{DFB} = 10/1$ ,  $v/v$ ,  $-50^\circ\text{C}$ ).  $^1\text{H}$  NMR peaks for  $\text{Al}_2\text{Me}_6$ ,  $\text{Ph}_3\text{C-Me}$  and toluene are assigned.

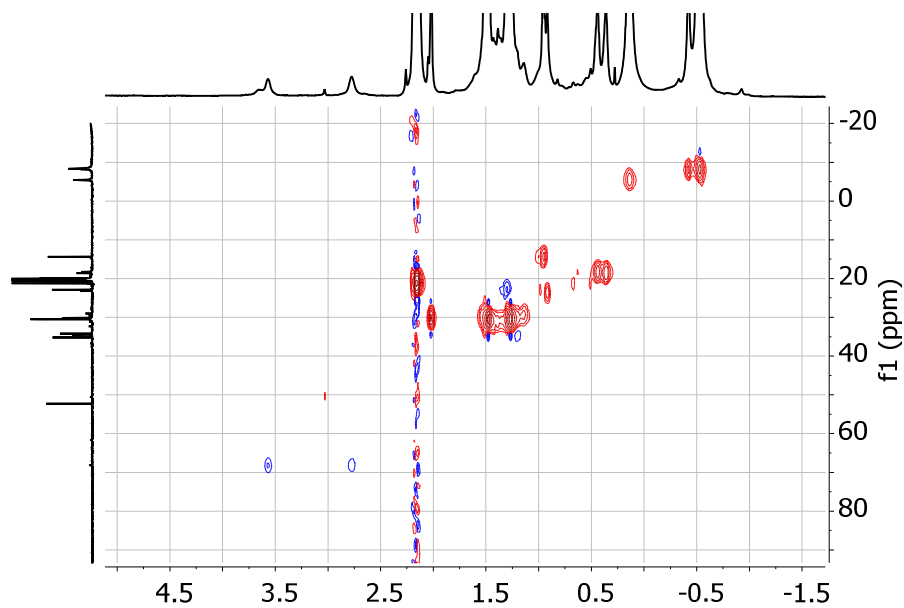

**Figure S21.** HSQC NMR spectra (600 MHz) of *in situ* generated  $[\text{Zr-Al}](7)$  ( $\text{C}_7\text{D}_8/\text{DFB} = 10/1$ ,  $v/v$ ,  $-50^\circ\text{C}$ ); the solution also contains  $\text{Al}_2\text{Me}_6$ ,  $\text{Ph}_3\text{C-Me}$ , and toluene.



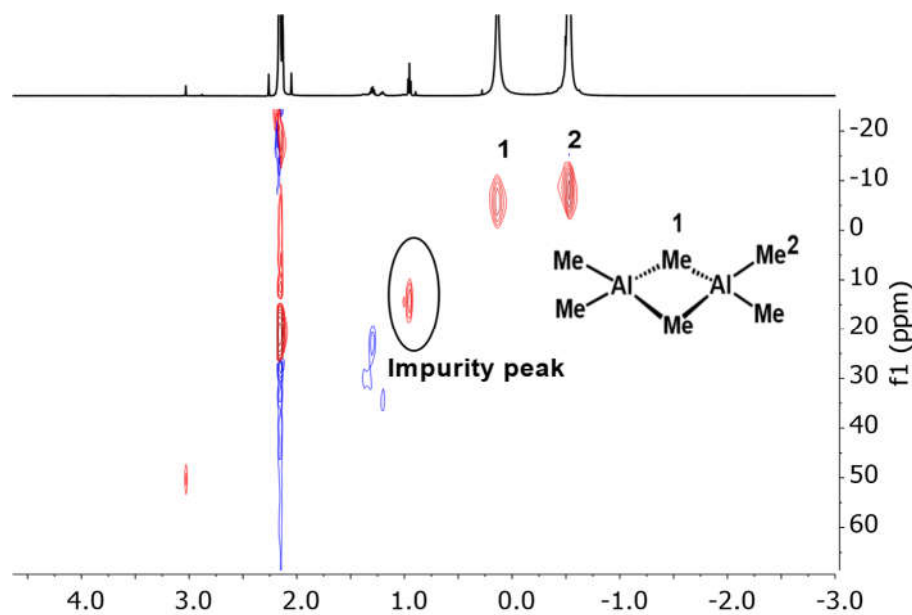

**Figure S22.** HSQC NMR spectra (600 MHz) of TMA ( $C_7D_8/DFB = 10/1$ , v/v,  $-50\text{ }^{\circ}\text{C}$ ). In the solution: TMA (0.05 ml, 0.1 mmol, 2.0 M in toluene);  $C_7D_8$  (0.472 g, 0.5 mL); DFB (0.058 g, 0.05 mL).

### 3) Reaction of $FI_2ZrMe_2$ (**3**) + TMA: Slow ancillary ligand transfer!

Procedure: In a glovebox,  $FI_2ZrMe_2$  (**3**) (7.0 mg, 10  $\mu\text{mol}$ , 1.0 equiv) and  $C_6D_6$  (0.659 g, 0.7 mL) were added to a vial. The solution was then transferred into an NMR tube equipped with Precision Seal® rubber septum cap, and removed from the glovebox. TMA (0.025 mL, 0.05 mmol, 50 equiv) was added to the NMR tube via syringe. The NMR spectra were then recorded after 20 min. After 1 d, the same NMR experiments were recorded again for comparison. There is an obvious  $^1\text{H}$  NMR chemical shift change upon addition of TMA, which indicates the coordination of TMA to  $FI_2ZrMe_2$  (**3**).  $FI_2ZrMe_2$  (**3**) then undergoes slow ancillary ligand transfer in the presence of TMA, as indicated by the NMR comparison with  $FIAlMe_2$  (**5**) + TMA (**Figure S23**). Peaks **A** and **B** represent  $NCH_2CH(CH_3)_2$  of the intact TMA-coordinated  $FI_2ZrMe_2$  (**3**) and  $FIAlMe_2$  (**5**), respectively. Using Ph-*Me* (toluene from added TMA solution) as an internal reference, the NMR yield of ancillary ligand transfer product,  $FIAlMe_2$  (**5**), is estimated to be approx 59%, while the remaining 41% is TMA-coordinated  $FI_2ZrMe_2$  (**3**).

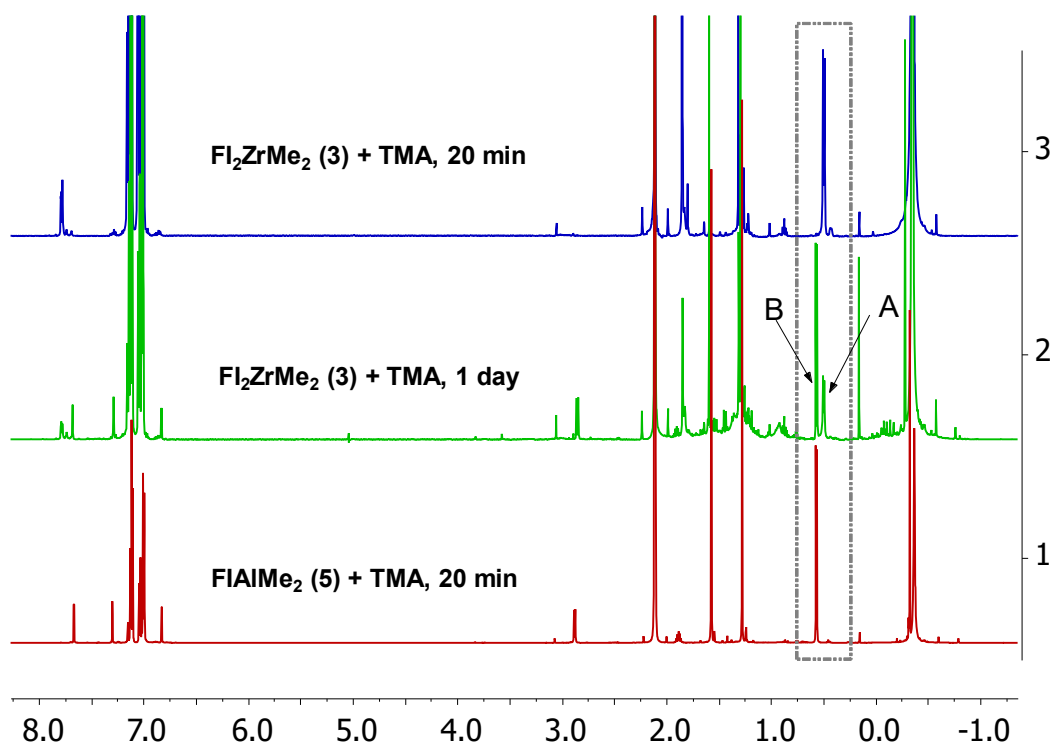

**Figure S23.** Comparison of  $^1\text{H}$  NMR spectra ( $\text{C}_6\text{D}_6$ ,  $25^\circ\text{C}$ ) (499 MHz): **FI<sub>2</sub>ZrMe<sub>2</sub> (3)** + TMA mixing for 20 min vs. 1 d vs. **FIAI Me<sub>2</sub> (5)** + TMA mixing for 20 min. Peaks **A** and **B** represent  $\text{NCH}_2\text{CH}(\text{CH}_3)_2$  of the intact TMA-coordinated **FI<sub>2</sub>ZrMe<sub>2</sub> (3)** and **FIAI Me<sub>2</sub> (5)**, respectively.

#### 4) Reaction of **FI<sub>2</sub>Zr(NMe<sub>2</sub>)<sub>2</sub> (1)** + TMA vs. **FI<sub>2</sub>ZrMe<sub>2</sub> (3)** + TMA and **FIAI Me<sub>2</sub> (5)** + TMA

The procedures for the three NMR reactions are the same, using **FI<sub>2</sub>ZrMe<sub>2</sub> (3)** as an example: In a glovebox, **FI<sub>2</sub>ZrMe<sub>2</sub> (3)** (14.0 mg, 20  $\mu\text{mol}$ , 1.0 equiv),  $\text{C}_7\text{D}_8$  (0.472 g, 0.5 mL), and DFB (0.058 g, 0.05 mL) were added to a vial. The vial was capped and then shaken for 1 min before the solution was transferred into an NMR tube equipped with Precision Seal® rubber septum cap, and removed from the glovebox. TMA (0.05 mL, 0.1 mmol, 100 equiv) was added to the NMR tube via syringe. NMR spectra were recorded after 30 min. The NMR comparison is shown in **Figure S24**.

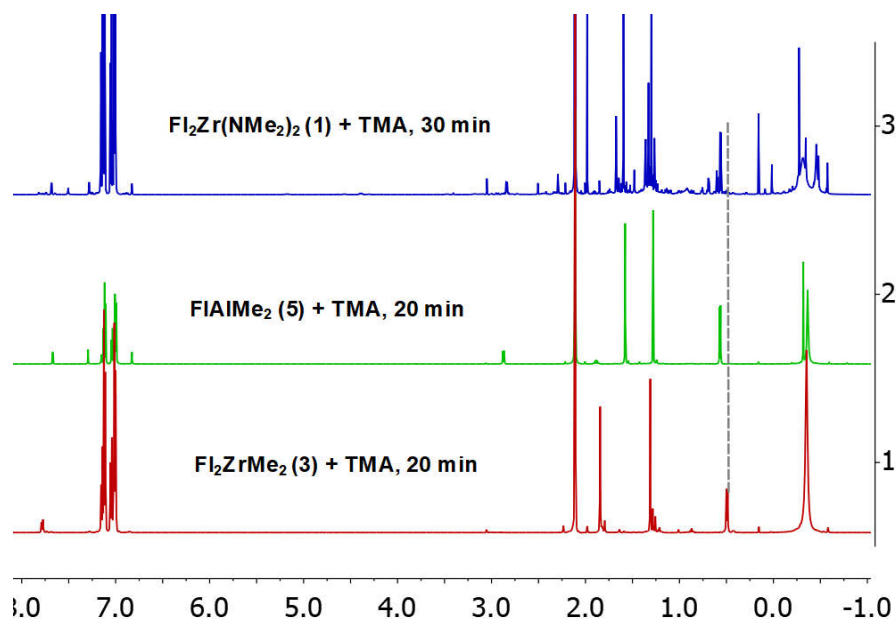

**Figure S24.** NMR spectra (499 MHz) of  $\text{FI}_2\text{Zr}(\text{NMe}_2)_2$  (**1**) + TMA,  $\text{FI}_2\text{ZrMe}_2$  (**3**) + TMA,  $\text{Al}(\text{Me})_3$  (**5**) + TMA. ( $\text{C}_7\text{D}_8/\text{DFB} = 10/1$ ,  $\nu/\nu$ ,  $-50^\circ\text{C}$ ).

#### Attempted Use of Mono-FI Precatalyst $\text{FIZrBn}_3$ as a Control

Mono-FI-Zr-alkyl complexes, i.e.,  $\text{FIZrMe}_3$  or  $\text{FIZrBn}_3$ , would be ideal models for a comparative study. Some mono-FI Zr complexes with bulky aromatic groups on the imine N are known in the literature such as:  $\text{FI}^*\text{ZrBn}_3$ ,<sup>11</sup>  $\text{FI}^*\text{TiMe}_3$ ,<sup>12-13</sup>  $\text{FI}^*\text{TiCl}_3(\text{THF})$ ,<sup>14-16</sup> and  $\text{FI}^*\text{TiCl}_3$ .<sup>13</sup> Note that these mono-FI\* Ti or Zr complexes all have bulky aromatic substituents on the FI\* ligand imine N. In contrast, the FI ligand in the present study has a less bulky isobutyl group on FI ligand imine N. While a  $\text{FI}^*\text{TiCl}_3(\text{THF})$  type Ti complex was reported with cyclohexyl group on imine N, the corresponding  $\text{FI}^*\text{ZrCl}_3(\text{THF})$  Zr complex is reported to be unstable even at low temperatures.<sup>17</sup> To the best of our knowledge, no mono-FIZr complex with less bulky aliphatic groups such as isobutyl on the FI imine N has yet been isolated.<sup>16-19</sup>

Several synthetic reactions were attempted with the aim of preparing the ideal model  $\text{FIZrR}_3$  complex ( $\text{R} = \text{Me}, \text{Bn}$ ) but were not successful. These include: 1. Reaction of HFI with 1 equiv of  $\text{ZrBn}_4$ ; 2. Reaction of more bulky HFI\* (methylcyclohexyl group on imine N) with 1 equiv of  $\text{ZrBn}_4$ ; 3. Reaction of HFI with 5 equiv of in situ generated “ $\text{ZrMe}_4$ ” from  $\text{ZrCl}_4 + 4\text{MeMgBr}$ , toluene at  $-78^\circ\text{C}$ ;<sup>20</sup> 4. Further adding 10 equiv of TMA to the reaction mixture of reaction 3 at  $-78^\circ\text{C}$  in hope that TMA would assist in stabilizing  $\text{FIZrMe}_3$  if it formed.

We also attempted to use the FI<sup>''</sup>BZrBn<sub>3</sub> complex reported by Chen *et al* (shown below)<sup>11</sup> as a control. It is known that substituents on the FI ligand imine N (alkyl vs. aromatic) exhibit dramatic effects on catalyst polymerization properties such as activity, comonomer selectivity, catalyst stability, etc.<sup>19</sup> However, in our hands this catalyst is barely active in ethylene/1-octene copolymerization under the following polymerization conditions: FI<sup>''</sup>ZrBn<sub>3</sub>, 10 μmol, 7.6 mg; Ph<sub>3</sub>C<sup>+</sup>B(C<sub>6</sub>F<sub>5</sub>)<sub>4</sub><sup>-</sup>, 11 μmol, 10.2 mg; 1-octene, 5 mL, 3.58 g; 1 atm ethylene; toluene, 45 mL; 40 °C; reaction time, 3 min. Only 20 mg polymer is obtained for FI<sup>''</sup>ZrBn<sub>3</sub> vs. 2.37 g/0.5 min for FI<sub>2</sub>ZrBn<sub>2</sub> (2) under the same conditions (Table 1, Entry 4 in the manuscript). The finding is not unexpected since dramatic FI imine N (alkyl vs. aromatic) substituent effects on the catalyst activity, comonomer selectivity, catalyst stability, etc., have been well established.<sup>19</sup> Thus, changing the R group on imine N from isobutyl to 2,6-diisopropylphenyl makes it possible to get the mono-FI Zr complex FI<sup>''</sup>ZrBn<sub>3</sub>, however, it is a poor mono-FI control for this study.

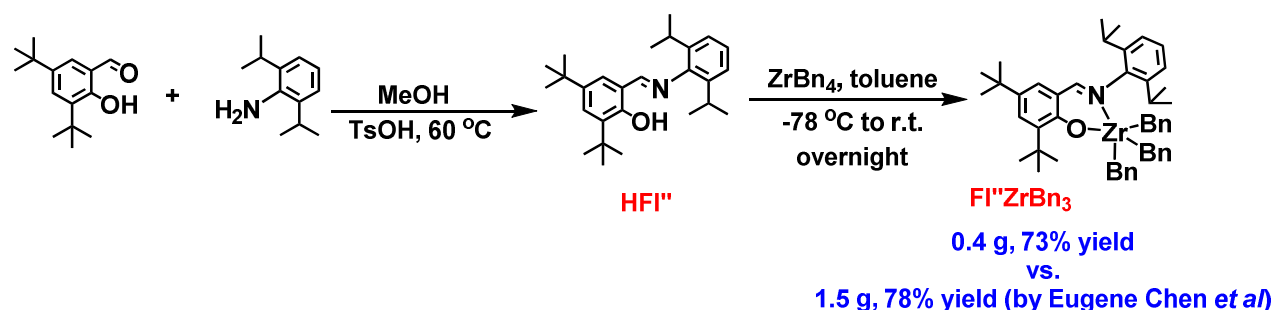

### X-Ray Data Collection, Structure Solution, and Refinement

Single crystals of FI<sub>2</sub>Zr(NMe<sub>2</sub>)<sub>2</sub> (1), FI<sub>2</sub>ZrMe<sub>2</sub> (3), FI<sub>2</sub>ZrCl<sub>2</sub> (4), FIAlMe<sub>2</sub> (5) and FIZr(NMe<sub>2</sub>)<sub>3</sub> (6) were obtained from toluene/*n*-hexane, toluene, toluene, *n*-hexane, and pentane solution, respectively. A suitable crystal was selected and the crystal was mounted on a MITIGEN holder in Paratone oil on a Kappa Apex 2 diffractometer. The crystal was kept at 99.99 K during data collection. Using Olex2,<sup>21</sup> the structure was solved with the ShelXT<sup>22</sup> structure solution program using Intrinsic Phasing and refined with the ShelXL<sup>23</sup> refinement package using Least Squares minimization. The enhanced rigid-bond restraint (SHELX keyword RIGU) was applied globally.<sup>24</sup> Crystallographic and experimental details of the structure determination are summarized in **Table S1**. Bonds and angles are shown from **Table S2** to **Table S11**.

**Table S1. Crystal data and structure refinement.**

| Complexes                                        | 1                                                                | 3                                                                | 4                                                                                | 5                                                    | 6                                                    |
|--------------------------------------------------|------------------------------------------------------------------|------------------------------------------------------------------|----------------------------------------------------------------------------------|------------------------------------------------------|------------------------------------------------------|
| Empirical formula                                | C <sub>42</sub> H <sub>72</sub> N <sub>4</sub> O <sub>2</sub> Zr | C <sub>40</sub> H <sub>66</sub> N <sub>2</sub> O <sub>2</sub> Zr | C <sub>52</sub> H <sub>76</sub> Cl <sub>2</sub> N <sub>2</sub> O <sub>2</sub> Zr | C <sub>23.5</sub> H <sub>42</sub> AlNO               | C <sub>25</sub> H <sub>48</sub> N <sub>4</sub> OZr   |
| FW                                               | 756.25                                                           | 698.16                                                           | 923.26                                                                           | 381.56                                               | 511.89                                               |
| Temperature/K                                    | 99.99                                                            | 100.02                                                           | 99.99                                                                            | 100.0                                                | 100.0                                                |
| Crystal system                                   | monoclinic                                                       | tetragonal                                                       | monoclinic                                                                       | monoclinic                                           | triclinic                                            |
| Space group                                      | C2/c                                                             | P4 <sub>3</sub>                                                  | C2/c                                                                             | C2/c                                                 | P-1                                                  |
| a / Å                                            | 22.969(2)                                                        | 17.2175(7)                                                       | 34.428(4)                                                                        | 20.2677(12)                                          | 9.5295(19)                                           |
| b / Å                                            | 18.6514(16)                                                      | 17.2175(7)                                                       | 7.6685(8)                                                                        | 12.6644(8)                                           | 12.293(3)                                            |
| c / Å                                            | 13.3922(12)                                                      | 41.838(2)                                                        | 20.142(2)                                                                        | 19.5770(12)                                          | 13.196(3)                                            |
| $\alpha$ / °                                     | 90                                                               | 90                                                               | 90                                                                               | 90                                                   | 103.64(3)                                            |
| $\beta$ / °                                      | 124.639(2)                                                       | 90                                                               | 102.221(3)                                                                       | 100.055(3)                                           | 98.59(3)                                             |
| $\gamma$ / °                                     | 90                                                               | 90                                                               | 90                                                                               | 90                                                   | 105.65(3)                                            |
| Volume / Å <sup>3</sup>                          | 4720.3(7)                                                        | 12402.4(12)                                                      | 5197.2(9)                                                                        | 4947.8(5)                                            | 1408.6(6)                                            |
| Z                                                | 4                                                                | 12                                                               | 4                                                                                | 8                                                    | 2                                                    |
| $\rho_{\text{calcd}}/(\text{mg}/\text{mm}^{-3})$ | 1.064                                                            | 1.122                                                            | 1.180                                                                            | 1.024                                                | 1.207                                                |
| $\mu$ / mm <sup>-1</sup>                         | 2.154                                                            | 0.298                                                            | 2.960                                                                            | 0.782                                                | 0.412                                                |
| F(000)                                           | 1632                                                             | 4512                                                             | 1968                                                                             | 1688                                                 | 548.0                                                |
| Crystal size / mm <sup>3</sup>                   | 0.364 × 0.146<br>× 0.054                                         | 0.093 × 0.073 ×<br>0.017                                         | 0.226×0.091×0.066                                                                | 0.379 × 0.286<br>× 0.256                             | 0.249×0.172×0.092                                    |
| 2 $\theta$ range for data<br>collection          | 6.658 to<br>136.704°                                             | 1.946 to 51.39°                                                  | 8.984 to 136.336°                                                                | 8.268 to<br>133.344°                                 | 3.262 to 49.356°                                     |
| Reflections collected                            | 31709                                                            | 126771                                                           | 32616                                                                            | 14159                                                | 4683                                                 |
| Independent reflections                          | 4192                                                             | 23461                                                            | 4716                                                                             | 4265                                                 | 4683                                                 |
| Data/restraints/parameters                       | 4192/0/232                                                       | 23461/1162/1270                                                  | 4716/380/418                                                                     | 4265/21/274                                          | 4683/0/326                                           |
| Goodness-of-fit on F <sup>2</sup>                | 1.052                                                            | 1.086                                                            | 1.071                                                                            | 1.126                                                | 1.055                                                |
| Final R indices<br>[I>2 $\sigma$ (I)]            | R <sub>1</sub> = 0.0241,<br>wR <sub>2</sub> = 0.0614             | R <sub>1</sub> = 0.0706,<br>wR <sub>2</sub> = 0.1616             | R <sub>1</sub> = 0.0326,<br>wR <sub>2</sub> = 0.0811                             | R <sub>1</sub> = 0.0443,<br>wR <sub>2</sub> = 0.1121 | R <sub>1</sub> = 0.0337,<br>wR <sub>2</sub> = 0.0942 |
| Final R indices<br>[all data]                    | R <sub>1</sub> = 0.0244,<br>wR <sub>2</sub> = 0.0616             | R <sub>1</sub> = 0.0897,<br>wR <sub>2</sub> = 0.1717             | R <sub>1</sub> = 0.0342,<br>wR <sub>2</sub> = 0.0827                             | R <sub>1</sub> = 0.0453,<br>wR <sub>2</sub> = 0.1128 | R <sub>1</sub> = 0.0365,<br>wR <sub>2</sub> = 0.0967 |
| Largest diff. Peak/hole/ e<br>Å <sup>-3</sup>    | 0.405/-0.467                                                     | 0.894/-0.900                                                     | 0.371/-0.900                                                                     | 0.357/-0.259                                         | 0.71/-0.60                                           |

**Table S2. Bond Lengths (Å) for 1.**

| Atom | Atom            | Length/Å   | Atom | Atom | Length/Å |
|------|-----------------|------------|------|------|----------|
| Zr1  | O1 <sup>1</sup> | 2.0357(10) | C3   | C4   | 1.402(2) |
| Zr1  | O1              | 2.0357(10) | C4   | C5   | 1.380(2) |

|     |                 |            |     |     |          |
|-----|-----------------|------------|-----|-----|----------|
| Zr1 | N1              | 2.4371(12) | C4  | C12 | 1.541(2) |
| Zr1 | N1 <sup>1</sup> | 2.4370(12) | C5  | C6  | 1.404(2) |
| Zr1 | N2              | 2.0766(13) | C6  | C7  | 1.452(2) |
| Zr1 | N2 <sup>1</sup> | 2.0766(13) | C8  | C9  | 1.538(2) |
| O1  | C1              | 1.3240(18) | C8  | C10 | 1.537(2) |
| N1  | C7              | 1.287(2)   | C8  | C11 | 1.534(2) |
| N1  | C16             | 1.4749(18) | C12 | C13 | 1.523(3) |
| N2  | C20             | 1.448(2)   | C12 | C14 | 1.522(3) |
| N2  | C21             | 1.455(2)   | C12 | C15 | 1.515(3) |
| C1  | C2              | 1.419(2)   | C16 | C17 | 1.535(2) |
| C1  | C6              | 1.412(2)   | C17 | C18 | 1.529(2) |
| C2  | C3              | 1.392(2)   | C17 | C19 | 1.522(2) |
| C2  | C8              | 1.537(2)   |     |     |          |

**Table S3. Bond Angles (°) for 1.**

| Atom            | Atom | Atom            | Angle/°   | Atom | Atom | Atom | Angle/°    |
|-----------------|------|-----------------|-----------|------|------|------|------------|
| O1 <sup>1</sup> | Zr1  | O1              | 156.69(6) | C3   | C2   | C8   | 122.00(14) |
| O1 <sup>1</sup> | Zr1  | N1 <sup>1</sup> | 76.08(4)  | C2   | C3   | C4   | 124.58(15) |
| O1 <sup>1</sup> | Zr1  | N1              | 85.95(4)  | C3   | C4   | C12  | 121.14(15) |
| O1              | Zr1  | N1 <sup>1</sup> | 85.95(4)  | C5   | C4   | C3   | 116.58(14) |
| O1              | Zr1  | N1              | 76.08(4)  | C5   | C4   | C12  | 122.15(15) |
| O1 <sup>1</sup> | Zr1  | N2              | 94.12(5)  | C4   | C5   | C6   | 121.88(14) |
| O1 <sup>1</sup> | Zr1  | N2 <sup>1</sup> | 101.39(5) | C1   | C6   | C7   | 122.82(13) |
| O1              | Zr1  | N2              | 101.39(5) | C5   | C6   | C1   | 120.21(14) |
| O1              | Zr1  | N2 <sup>1</sup> | 94.12(5)  | C5   | C6   | C7   | 116.72(13) |
| N1 <sup>1</sup> | Zr1  | N1              | 79.26(6)  | N1   | C7   | C6   | 128.65(13) |
| N2              | Zr1  | N1 <sup>1</sup> | 92.24(5)  | C2   | C8   | C9   | 109.22(12) |
| N2 <sup>1</sup> | Zr1  | N1 <sup>1</sup> | 171.23(5) | C2   | C8   | C10  | 111.04(13) |
| N2              | Zr1  | N1              | 171.23(5) | C10  | C8   | C9   | 110.15(14) |

|                 |     |                 |            |     |     |     |            |
|-----------------|-----|-----------------|------------|-----|-----|-----|------------|
| N2 <sup>1</sup> | Zr1 | N1              | 92.24(5)   | C11 | C8  | C2  | 111.87(14) |
| N2              | Zr1 | N2 <sup>1</sup> | 96.34(7)   | C11 | C8  | C9  | 107.23(14) |
| C1              | O1  | Zr1             | 145.28(9)  | C11 | C8  | C10 | 107.25(13) |
| C7              | N1  | Zr1             | 124.78(10) | C13 | C12 | C4  | 111.79(15) |
| C7              | N1  | C16             | 114.70(12) | C14 | C12 | C4  | 108.71(14) |
| C16             | N1  | Zr1             | 120.45(9)  | C14 | C12 | C13 | 107.43(18) |
| C20             | N2  | Zr1             | 127.60(11) | C15 | C12 | C4  | 111.34(15) |
| C20             | N2  | C21             | 111.03(13) | C15 | C12 | C13 | 110.4(2)   |
| C21             | N2  | Zr1             | 121.05(11) | C15 | C12 | C14 | 107.0(2)   |
| O1              | C1  | C2              | 121.17(13) | N1  | C16 | C17 | 112.44(12) |
| O1              | C1  | C6              | 119.68(13) | C18 | C17 | C16 | 108.78(13) |
| C6              | C1  | C2              | 119.14(13) | C19 | C17 | C16 | 111.90(13) |
| C1              | C2  | C8              | 120.47(13) | C19 | C17 | C18 | 109.97(13) |
| C3              | C2  | C1              | 117.46(14) |     |     |     |            |

**Table S4. Bond Lengths (Å) for 3.**

| Atom | Atom | Length/Å  | Atom | Atom | Length/Å  |
|------|------|-----------|------|------|-----------|
| Zr1  | O1   | 2.013(9)  | C13A | C14A | 1.516(19) |
| Zr1  | O2   | 1.998(9)  | C13A | C15A | 1.536(16) |
| Zr1  | N1   | 2.403(11) | C13A | C16A | 1.555(18) |
| Zr1  | N2   | 2.402(10) | C18A | C19A | 1.501(17) |
| Zr1  | C1   | 2.282(13) | C19A | C20A | 1.49(2)   |
| Zr1  | C2   | 2.261(13) | C19A | C21A | 1.561(17) |
| O1   | C3   | 1.321(15) | C22A | C23A | 1.432(16) |
| O2   | C22  | 1.367(16) | C22A | C27A | 1.368(17) |
| N1   | C17  | 1.330(16) | C23A | C24A | 1.371(17) |
| N1   | C18  | 1.497(15) | C23A | C28A | 1.522(17) |
| N2   | C36  | 1.284(16) | C24A | C25A | 1.408(18) |
| N2   | C37  | 1.466(16) | C25A | C26A | 1.372(18) |

|     |     |           |      |      |           |
|-----|-----|-----------|------|------|-----------|
| C3  | C4  | 1.409(16) | C25A | C32A | 1.515(17) |
| C3  | C8  | 1.425(17) | C26A | C27A | 1.441(17) |
| C4  | C5  | 1.373(18) | C27A | C36A | 1.425(16) |
| C4  | C9  | 1.553(18) | C28A | C29A | 1.517(19) |
| C5  | C6  | 1.451(19) | C28A | C30A | 1.50(2)   |
| C6  | C7  | 1.366(18) | C28A | C31A | 1.559(18) |
| C6  | C13 | 1.526(19) | C32A | C33A | 1.53(2)   |
| C7  | C8  | 1.424(18) | C32A | C34A | 1.519(18) |
| C8  | C17 | 1.407(17) | C32A | C35A | 1.53(2)   |
| C9  | C10 | 1.540(19) | C37A | C38A | 1.513(18) |
| C9  | C11 | 1.530(19) | C38A | C39A | 1.49(2)   |
| C9  | C12 | 1.502(19) | C38A | C40A | 1.499(19) |
| C13 | C14 | 1.54(2)   | Zr1B | O1B  | 1.991(9)  |
| C13 | C15 | 1.522(18) | Zr1B | O2B  | 2.014(8)  |
| C13 | C16 | 1.54(2)   | Zr1B | N1B  | 2.419(11) |
| C18 | C19 | 1.521(18) | Zr1B | N2B  | 2.398(10) |
| C19 | C20 | 1.51(2)   | Zr1B | C1B  | 2.299(13) |
| C19 | C21 | 1.526(19) | Zr1B | C2B  | 2.269(13) |
| C22 | C23 | 1.387(18) | O1B  | C3B  | 1.362(15) |
| C22 | C27 | 1.408(17) | O2B  | C22B | 1.315(15) |
| C23 | C24 | 1.418(17) | N1B  | C17B | 1.284(16) |
| C23 | C28 | 1.555(18) | N1B  | C18B | 1.427(16) |
| C24 | C25 | 1.403(17) | N2B  | C36B | 1.322(15) |
| C25 | C26 | 1.400(18) | N2B  | C37B | 1.478(16) |
| C25 | C32 | 1.512(18) | C3B  | C4B  | 1.419(17) |
| C26 | C27 | 1.370(17) | C3B  | C8B  | 1.392(17) |
| C27 | C36 | 1.427(17) | C4B  | C5B  | 1.381(18) |
| C28 | C29 | 1.52(2)   | C4B  | C9B  | 1.531(18) |



|      |      |           |      |      |           |
|------|------|-----------|------|------|-----------|
| C28  | C30  | 1.54(2)   | C5B  | C6B  | 1.377(18) |
| C28  | C31  | 1.482(19) | C6B  | C7B  | 1.418(19) |
| C32  | C33  | 1.53(2)   | C6B  | C13B | 1.548(18) |
| C32  | C34  | 1.572(19) | C7B  | C8B  | 1.360(18) |
| C32  | C35  | 1.54(2)   | C8B  | C17B | 1.485(18) |
| C37  | C38  | 1.534(19) | C9B  | C10B | 1.52(2)   |
| C38  | C39  | 1.54(2)   | C9B  | C11B | 1.54(2)   |
| C38  | C40  | 1.52(2)   | C9B  | C12B | 1.51(2)   |
| Zr1A | O1A  | 1.996(8)  | C13B | C14B | 1.50(2)   |
| Zr1A | O2A  | 2.017(8)  | C13B | C15B | 1.54(2)   |
| Zr1A | N1A  | 2.407(10) | C13B | C16B | 1.48(2)   |
| Zr1A | N2A  | 2.424(10) | C18B | C19B | 1.535(17) |
| Zr1A | C1A  | 2.304(12) | C19B | C20B | 1.530(19) |
| Zr1A | C2A  | 2.275(12) | C19B | C21B | 1.534(18) |
| O1A  | C3A  | 1.351(15) | C22B | C23B | 1.439(17) |
| O2A  | C22A | 1.312(15) | C22B | C27B | 1.399(17) |
| N1A  | C17A | 1.253(15) | C23B | C24B | 1.356(17) |
| N1A  | C18A | 1.480(15) | C23B | C28B | 1.548(17) |
| N2A  | C36A | 1.294(15) | C24B | C25B | 1.420(18) |
| N2A  | C37A | 1.453(15) | C25B | C26B | 1.412(17) |
| C3A  | C4A  | 1.427(16) | C25B | C32B | 1.536(18) |
| C3A  | C8A  | 1.404(16) | C26B | C27B | 1.410(17) |
| C4A  | C5A  | 1.382(17) | C27B | C36B | 1.444(17) |
| C4A  | C9A  | 1.540(16) | C28B | C29B | 1.535(19) |
| C5A  | C6A  | 1.376(17) | C28B | C30B | 1.532(19) |
| C6A  | C7A  | 1.409(17) | C28B | C31B | 1.575(18) |
| C6A  | C13A | 1.521(18) | C32B | C33B | 1.550(19) |
| C7A  | C8A  | 1.372(17) | C32B | C34B | 1.517(19) |

|     |      |           |      |      |           |
|-----|------|-----------|------|------|-----------|
| C8A | C17A | 1.473(17) | C32B | C35B | 1.501(19) |
| C9A | C10A | 1.555(17) | C37B | C38B | 1.523(17) |
| C9A | C11A | 1.563(17) | C38B | C39B | 1.516(17) |
| C9A | C12A | 1.544(17) | C38B | C40B | 1.559(18) |

**Table S5. Bond Angles (°) for 3.**

| Atom | Atom | Atom | Angle/°   | Atom | Atom | Atom | Angle/°   |
|------|------|------|-----------|------|------|------|-----------|
| O1   | Zr1  | N1   | 76.2(3)   | C6A  | C13A | C15A | 109.9(10) |
| O1   | Zr1  | N2   | 97.0(4)   | C6A  | C13A | C16A | 111.3(11) |
| O1   | Zr1  | C1   | 95.0(4)   | C14A | C13A | C6A  | 109.0(11) |
| O1   | Zr1  | C2   | 89.0(5)   | C14A | C13A | C15A | 111.3(12) |
| O2   | Zr1  | O1   | 172.6(4)  | C14A | C13A | C16A | 106.5(11) |
| O2   | Zr1  | N1   | 100.2(4)  | C15A | C13A | C16A | 108.8(11) |
| O2   | Zr1  | N2   | 75.7(4)   | N1A  | C17A | C8A  | 128.1(11) |
| O2   | Zr1  | C1   | 91.4(4)   | N1A  | C18A | C19A | 112.5(10) |
| O2   | Zr1  | C2   | 93.5(5)   | C18A | C19A | C21A | 109.8(11) |
| N2   | Zr1  | N1   | 72.9(4)   | C20A | C19A | C18A | 112.5(11) |
| C1   | Zr1  | N1   | 89.4(5)   | C20A | C19A | C21A | 112.0(11) |
| C1   | Zr1  | N2   | 155.5(4)  | O2A  | C22A | C23A | 119.9(11) |
| C2   | Zr1  | N1   | 162.9(5)  | O2A  | C22A | C27A | 120.1(11) |
| C2   | Zr1  | N2   | 101.0(5)  | C27A | C22A | C23A | 119.9(12) |
| C2   | Zr1  | C1   | 100.5(6)  | C22A | C23A | C28A | 120.3(11) |
| C3   | O1   | Zr1  | 145.7(8)  | C24A | C23A | C22A | 116.3(11) |
| C22  | O2   | Zr1  | 146.5(8)  | C24A | C23A | C28A | 123.3(11) |
| C17  | N1   | Zr1  | 126.7(8)  | C23A | C24A | C25A | 126.1(12) |
| C17  | N1   | C18  | 116.1(11) | C24A | C25A | C32A | 119.1(12) |
| C18  | N1   | Zr1  | 117.1(8)  | C26A | C25A | C24A | 116.3(12) |
| C36  | N2   | Zr1  | 125.9(9)  | C26A | C25A | C32A | 124.6(12) |
| C36  | N2   | C37  | 116.1(11) | C25A | C26A | C27A | 120.3(12) |

|     |     |     |           |      |      |      |           |
|-----|-----|-----|-----------|------|------|------|-----------|
| C37 | N2  | Zr1 | 118.0(8)  | C22A | C27A | C26A | 120.9(11) |
| O1  | C3  | C4  | 121.0(11) | C22A | C27A | C36A | 123.3(11) |
| O1  | C3  | C8  | 119.1(11) | C36A | C27A | C26A | 115.7(11) |
| C4  | C3  | C8  | 119.9(12) | C23A | C28A | C31A | 110.5(10) |
| C3  | C4  | C9  | 120.6(12) | C29A | C28A | C23A | 112.5(11) |
| C5  | C4  | C3  | 118.9(12) | C29A | C28A | C31A | 108.2(11) |
| C5  | C4  | C9  | 120.5(11) | C30A | C28A | C23A | 109.9(11) |
| C4  | C5  | C6  | 122.8(12) | C30A | C28A | C29A | 110.2(11) |
| C5  | C6  | C13 | 117.9(11) | C30A | C28A | C31A | 105.3(12) |
| C7  | C6  | C5  | 117.6(12) | C25A | C32A | C33A | 111.1(12) |
| C7  | C6  | C13 | 124.3(12) | C25A | C32A | C34A | 109.3(11) |
| C6  | C7  | C8  | 121.5(12) | C25A | C32A | C35A | 111.4(11) |
| C7  | C8  | C3  | 119.4(11) | C33A | C32A | C35A | 108.4(12) |
| C17 | C8  | C3  | 124.3(11) | C34A | C32A | C33A | 108.9(12) |
| C17 | C8  | C7  | 116.2(11) | C34A | C32A | C35A | 107.6(12) |
| C10 | C9  | C4  | 112.0(11) | N2A  | C36A | C27A | 127.9(12) |
| C11 | C9  | C4  | 107.5(10) | N2A  | C37A | C38A | 113.0(11) |
| C11 | C9  | C10 | 108.7(12) | C39A | C38A | C37A | 114.5(12) |
| C12 | C9  | C4  | 111.3(11) | C39A | C38A | C40A | 109.8(12) |
| C12 | C9  | C10 | 105.9(11) | C40A | C38A | C37A | 110.7(12) |
| C12 | C9  | C11 | 111.5(12) | O1B  | Zr1B | O2B  | 170.9(3)  |
| C6  | C13 | C14 | 110.5(12) | O1B  | Zr1B | N1B  | 76.5(3)   |
| C6  | C13 | C16 | 111.4(11) | O1B  | Zr1B | N2B  | 95.1(3)   |
| C14 | C13 | C16 | 110.2(13) | O1B  | Zr1B | C1B  | 96.6(4)   |
| C15 | C13 | C6  | 108.3(12) | O1B  | Zr1B | C2B  | 90.0(4)   |
| C15 | C13 | C14 | 109.1(13) | O2B  | Zr1B | N1B  | 98.0(4)   |
| C15 | C13 | C16 | 107.2(12) | O2B  | Zr1B | N2B  | 76.2(3)   |
| N1  | C17 | C8  | 126.6(11) | O2B  | Zr1B | C1B  | 90.5(4)   |
| N1  | C18 | C19 | 113.4(11) | O2B  | Zr1B | C2B  | 94.0(4)   |

|     |     |     |           |      |      |      |           |
|-----|-----|-----|-----------|------|------|------|-----------|
| C18 | C19 | C21 | 107.1(12) | N2B  | Zr1B | N1B  | 72.9(3)   |
| C20 | C19 | C18 | 111.6(12) | C1B  | Zr1B | N1B  | 88.8(5)   |
| C20 | C19 | C21 | 111.1(13) | C1B  | Zr1B | N2B  | 155.2(5)  |
| O2  | C22 | C23 | 119.2(11) | C2B  | Zr1B | N1B  | 163.0(5)  |
| O2  | C22 | C27 | 118.2(11) | C2B  | Zr1B | N2B  | 98.6(5)   |
| C23 | C22 | C27 | 122.6(12) | C2B  | Zr1B | C1B  | 103.1(6)  |
| C22 | C23 | C24 | 116.1(12) | C3B  | O1B  | Zr1B | 145.8(8)  |
| C22 | C23 | C28 | 124.6(11) | C22B | O2B  | Zr1B | 145.9(8)  |
| C24 | C23 | C28 | 119.3(11) | C17B | N1B  | Zr1B | 125.4(8)  |
| C25 | C24 | C23 | 123.0(12) | C17B | N1B  | C18B | 115.5(11) |
| C24 | C25 | C32 | 118.7(12) | C18B | N1B  | Zr1B | 118.9(8)  |
| C26 | C25 | C24 | 117.4(12) | C36B | N2B  | Zr1B | 126.7(8)  |
| C26 | C25 | C32 | 123.9(12) | C36B | N2B  | C37B | 114.5(10) |
| C27 | C26 | C25 | 121.9(12) | C37B | N2B  | Zr1B | 118.7(8)  |
| C22 | C27 | C36 | 121.9(12) | O1B  | C3B  | C4B  | 119.9(11) |
| C26 | C27 | C22 | 119.0(12) | O1B  | C3B  | C8B  | 119.5(11) |
| C26 | C27 | C36 | 118.9(12) | C8B  | C3B  | C4B  | 120.6(12) |
| C29 | C28 | C23 | 110.0(12) | C3B  | C4B  | C9B  | 121.5(12) |
| C29 | C28 | C30 | 106.4(11) | C5B  | C4B  | C3B  | 115.3(12) |
| C30 | C28 | C23 | 108.3(11) | C5B  | C4B  | C9B  | 123.1(12) |
| C31 | C28 | C23 | 113.5(11) | C6B  | C5B  | C4B  | 125.7(13) |
| C31 | C28 | C29 | 109.9(12) | C5B  | C6B  | C7B  | 116.7(12) |
| C31 | C28 | C30 | 108.3(13) | C5B  | C6B  | C13B | 119.6(12) |
| C25 | C32 | C33 | 109.0(11) | C7B  | C6B  | C13B | 123.5(12) |
| C25 | C32 | C34 | 108.7(11) | C8B  | C7B  | C6B  | 120.0(13) |
| C25 | C32 | C35 | 113.1(12) | C3B  | C8B  | C17B | 121.4(11) |
| C33 | C32 | C34 | 109.1(12) | C7B  | C8B  | C3B  | 121.4(12) |
| C33 | C32 | C35 | 107.2(12) | C7B  | C8B  | C17B | 117.0(11) |
| C35 | C32 | C34 | 109.7(12) | C4B  | C9B  | C11B | 112.1(12) |

|      |      |      |           |      |      |      |           |
|------|------|------|-----------|------|------|------|-----------|
| N2   | C36  | C27  | 130.4(12) | C10B | C9B  | C4B  | 111.0(12) |
| N2   | C37  | C38  | 114.5(12) | C10B | C9B  | C11B | 106.4(13) |
| C37  | C38  | C39  | 108.0(12) | C12B | C9B  | C4B  | 109.9(12) |
| C40  | C38  | C37  | 113.3(13) | C12B | C9B  | C10B | 107.2(13) |
| C40  | C38  | C39  | 110.5(13) | C12B | C9B  | C11B | 110.0(12) |
| O1A  | Zr1A | O2A  | 171.0(3)  | C14B | C13B | C6B  | 108.1(12) |
| O1A  | Zr1A | N1A  | 75.8(3)   | C14B | C13B | C15B | 108.1(14) |
| O1A  | Zr1A | N2A  | 96.6(3)   | C15B | C13B | C6B  | 106.5(12) |
| O1A  | Zr1A | C1A  | 96.9(4)   | C16B | C13B | C6B  | 112.1(13) |
| O1A  | Zr1A | C2A  | 89.2(4)   | C16B | C13B | C14B | 109.8(14) |
| O2A  | Zr1A | N1A  | 98.4(3)   | C16B | C13B | C15B | 112.1(14) |
| O2A  | Zr1A | N2A  | 75.0(3)   | N1B  | C17B | C8B  | 129.3(12) |
| O2A  | Zr1A | C1A  | 90.2(4)   | N1B  | C18B | C19B | 114.6(11) |
| O2A  | Zr1A | C2A  | 94.8(4)   | C20B | C19B | C18B | 110.5(11) |
| N1A  | Zr1A | N2A  | 73.3(3)   | C20B | C19B | C21B | 110.7(12) |
| C1A  | Zr1A | N1A  | 93.5(5)   | C21B | C19B | C18B | 110.4(11) |
| C1A  | Zr1A | N2A  | 158.1(4)  | O2B  | C22B | C23B | 121.1(11) |
| C2A  | Zr1A | N1A  | 160.4(5)  | O2B  | C22B | C27B | 119.5(11) |
| C2A  | Zr1A | N2A  | 96.4(5)   | C27B | C22B | C23B | 119.3(11) |
| C2A  | Zr1A | C1A  | 100.9(6)  | C22B | C23B | C28B | 118.2(11) |
| C3A  | O1A  | Zr1A | 146.2(7)  | C24B | C23B | C22B | 117.4(11) |
| C22A | O2A  | Zr1A | 146.1(7)  | C24B | C23B | C28B | 123.7(11) |
| C17A | N1A  | Zr1A | 127.6(8)  | C23B | C24B | C25B | 125.3(12) |
| C17A | N1A  | C18A | 117.6(10) | C24B | C25B | C32B | 120.3(11) |
| C18A | N1A  | Zr1A | 114.6(8)  | C26B | C25B | C24B | 116.4(11) |
| C36A | N2A  | Zr1A | 125.9(8)  | C26B | C25B | C32B | 123.3(11) |
| C36A | N2A  | C37A | 118.7(10) | C27B | C26B | C25B | 120.0(12) |
| C37A | N2A  | Zr1A | 115.4(7)  | C22B | C27B | C26B | 121.3(11) |
| O1A  | C3A  | C4A  | 120.3(10) | C22B | C27B | C36B | 123.9(11) |

|      |     |      |           |      |      |      |           |
|------|-----|------|-----------|------|------|------|-----------|
| O1A  | C3A | C8A  | 119.3(10) | C26B | C27B | C36B | 114.8(11) |
| C8A  | C3A | C4A  | 120.3(11) | C23B | C28B | C31B | 109.2(10) |
| C3A  | C4A | C9A  | 121.3(11) | C29B | C28B | C23B | 110.6(11) |
| C5A  | C4A | C3A  | 115.5(11) | C29B | C28B | C31B | 106.2(11) |
| C5A  | C4A | C9A  | 123.2(10) | C30B | C28B | C23B | 109.4(11) |
| C6A  | C5A | C4A  | 126.9(12) | C30B | C28B | C29B | 111.6(12) |
| C5A  | C6A | C7A  | 114.8(12) | C30B | C28B | C31B | 109.8(12) |
| C5A  | C6A | C13A | 120.2(11) | C25B | C32B | C33B | 107.1(11) |
| C7A  | C6A | C13A | 124.8(12) | C34B | C32B | C25B | 107.2(11) |
| C8A  | C7A | C6A  | 122.8(12) | C34B | C32B | C33B | 111.9(12) |
| C3A  | C8A | C17A | 121.8(11) | C35B | C32B | C25B | 113.4(11) |
| C7A  | C8A | C3A  | 119.6(11) | C35B | C32B | C33B | 110.4(12) |
| C7A  | C8A | C17A | 118.6(11) | C35B | C32B | C34B | 106.9(12) |
| C4A  | C9A | C10A | 112.1(10) | N2B  | C36B | C27B | 126.2(11) |
| C4A  | C9A | C11A | 108.5(9)  | N2B  | C37B | C38B | 111.4(10) |
| C4A  | C9A | C12A | 111.0(10) | C37B | C38B | C40B | 107.0(11) |
| C10A | C9A | C11A | 108.0(11) | C39B | C38B | C37B | 113.4(11) |
| C12A | C9A | C10A | 107.5(10) | C39B | C38B | C40B | 111.0(11) |
| C12A | C9A | C11A | 109.7(10) |      |      |      |           |

**Table S6. Bond Lengths (Å) for 4.**

| Atom | Atom             | Length/Å   | Atom | Atom | Length/Å |
|------|------------------|------------|------|------|----------|
| Zr1  | C11              | 2.4312(6)  | C7   | C10  | 1.538(3) |
| Zr1  | C11 <sup>1</sup> | 2.4312(6)  | C11  | C12  | 1.537(5) |
| Zr1  | O1               | 1.9926(13) | C11  | C13  | 1.536(5) |
| Zr1  | O1 <sup>1</sup>  | 1.9927(13) | C11  | C14  | 1.537(6) |
| Zr1  | N1 <sup>1</sup>  | 2.3260(18) | C11A | C12A | 1.532(6) |
| Zr1  | N1               | 2.3260(18) | C11A | C13A | 1.539(6) |

|     |      |          |      |      |           |
|-----|------|----------|------|------|-----------|
| O1  | C1   | 1.340(3) | C11A | C14A | 1.520(6)  |
| N1  | C15  | 1.292(3) | C16  | C17  | 1.520(4)  |
| N1  | C16  | 1.478(3) | C17  | C18  | 1.534(3)  |
| C1  | C2   | 1.416(3) | C17  | C19  | 1.527(4)  |
| C1  | C6   | 1.399(4) | C20  | C21  | 1.371(7)  |
| C2  | C3   | 1.343(5) | C20  | C25  | 1.378(10) |
| C2  | C3A  | 1.478(5) | C20  | C26  | 1.377(10) |
| C2  | C7   | 1.527(4) | C21  | C22  | 1.372(9)  |
| C3  | C4   | 1.389(6) | C22  | C23  | 1.344(8)  |
| C3A | C4A  | 1.413(5) | C23  | C24  | 1.404(8)  |
| C4  | C5   | 1.386(5) | C24  | C25  | 1.390(11) |
| C4  | C11  | 1.537(7) | C25  | C26B | 1.584(17) |
| C4A | C5A  | 1.398(5) | C20A | C21A | 1.390(8)  |
| C4A | C11A | 1.542(7) | C20A | C25A | 1.404(9)  |
| C5  | C6   | 1.401(5) | C20A | C26A | 1.493(9)  |
| C5A | C6   | 1.459(5) | C21A | C22A | 1.379(8)  |
| C6  | C15  | 1.446(3) | C22A | C23A | 1.383(8)  |
| C7  | C8   | 1.534(4) | C23A | C24A | 1.389(9)  |
| C7  | C9   | 1.535(3) | C24A | C25A | 1.406(11) |

**Table S7. Bond Angles (°) for 4.**

| Atom            | Atom | Atom             | Angle/°   | Atom | Atom | Atom | Angle/°    |
|-----------------|------|------------------|-----------|------|------|------|------------|
| Cl1             | Zr1  | Cl1 <sup>1</sup> | 102.79(3) | C2   | C7   | C8   | 109.46(19) |
| O1              | Zr1  | Cl1              | 92.68(5)  | C2   | C7   | C9   | 112.2(2)   |
| O1              | Zr1  | Cl1 <sup>1</sup> | 95.26(4)  | C2   | C7   | C10  | 111.4(2)   |
| O1 <sup>1</sup> | Zr1  | Cl1 <sup>1</sup> | 92.68(5)  | C8   | C7   | C9   | 109.0(3)   |

|                 |     |                  |            |      |      |      |          |
|-----------------|-----|------------------|------------|------|------|------|----------|
| O1 <sup>1</sup> | Zr1 | Cl1              | 95.26(4)   | C8   | C7   | C10  | 107.8(2) |
| O1              | Zr1 | O1 <sup>1</sup>  | 167.26(8)  | C9   | C7   | C10  | 106.8(2) |
| O1 <sup>1</sup> | Zr1 | N1 <sup>1</sup>  | 77.83(6)   | C4   | C11  | C14  | 112.8(4) |
| O1              | Zr1 | N1               | 77.83(6)   | C12  | C11  | C4   | 108.9(4) |
| O1              | Zr1 | N1 <sup>1</sup>  | 92.04(6)   | C12  | C11  | C14  | 108.6(4) |
| O1 <sup>1</sup> | Zr1 | N1               | 92.04(6)   | C13  | C11  | C4   | 108.5(4) |
| N1              | Zr1 | Cl1 <sup>1</sup> | 91.45(5)   | C13  | C11  | C12  | 109.2(4) |
| N1 <sup>1</sup> | Zr1 | Cl1              | 91.45(5)   | C13  | C11  | C14  | 108.9(5) |
| N1              | Zr1 | Cl1              | 163.63(5)  | C12A | C11A | C4A  | 109.0(4) |
| N1 <sup>1</sup> | Zr1 | Cl1 <sup>1</sup> | 163.63(5)  | C12A | C11A | C13A | 108.6(4) |
| N1 <sup>1</sup> | Zr1 | N1               | 75.79(10)  | C13A | C11A | C4A  | 109.0(5) |
| C1              | O1  | Zr1              | 144.26(15) | C14A | C11A | C4A  | 110.9(4) |
| C15             | N1  | Zr1              | 126.42(16) | C14A | C11A | C12A | 112.1(6) |
| C15             | N1  | C16              | 115.97(19) | C14A | C11A | C13A | 107.1(5) |
| C16             | N1  | Zr1              | 117.58(13) | N1   | C15  | C6   | 128.4(2) |
| O1              | C1  | C2               | 120.7(2)   | N1   | C16  | C17  | 111.9(2) |
| O1              | C1  | C6               | 118.80(18) | C16  | C17  | C18  | 109.1(3) |
| C6              | C1  | C2               | 120.5(2)   | C16  | C17  | C19  | 112.8(2) |
| C1              | C2  | C3A              | 109.2(3)   | C19  | C17  | C18  | 111.1(2) |
| C1              | C2  | C7               | 122.0(2)   | C21  | C20  | C25  | 119.2(6) |
| C3              | C2  | C1               | 124.5(3)   | C21  | C20  | C26  | 126.1(8) |
| C3              | C2  | C7               | 113.3(3)   | C26  | C20  | C25  | 114.7(7) |
| C3A             | C2  | C7               | 128.2(3)   | C20  | C21  | C22  | 121.4(6) |
| C2              | C3  | C4               | 115.9(5)   | C23  | C22  | C21  | 119.8(5) |
| C4A             | C3A | C2               | 132.4(4)   | C22  | C23  | C24  | 120.9(6) |
| C3              | C4  | C11              | 117.8(4)   | C25  | C24  | C23  | 118.5(6) |
| C5              | C4  | C3               | 120.0(5)   | C20  | C25  | C24  | 120.3(6) |
| C5              | C4  | C11              | 122.2(5)   | C20  | C25  | C26B | 102.6(9) |



|     |     |      |            |      |      |      |           |
|-----|-----|------|------------|------|------|------|-----------|
| C3A | C4A | C11A | 121.5(4)   | C24  | C25  | C26B | 137.1(10) |
| C5A | C4A | C3A  | 114.9(4)   | C21A | C20A | C25A | 119.1(6)  |
| C5A | C4A | C11A | 123.7(4)   | C21A | C20A | C26A | 121.2(5)  |
| C4  | C5  | C6   | 125.3(5)   | C25A | C20A | C26A | 119.7(6)  |
| C4A | C5A | C6   | 115.3(4)   | C22A | C21A | C20A | 121.6(5)  |
| C1  | C6  | C5   | 112.5(3)   | C21A | C22A | C23A | 120.3(6)  |
| C1  | C6  | C5A  | 127.0(3)   | C22A | C23A | C24A | 118.9(5)  |
| C1  | C6  | C15  | 122.51(19) | C23A | C24A | C25A | 121.6(5)  |
| C5  | C6  | C15  | 124.4(3)   | C20A | C25A | C24A | 118.5(7)  |
| C15 | C6  | C5A  | 109.3(3)   |      |      |      |           |

**Table S8. Bond Lengths (Å) for 5.**

| Atom | Atom | Length/Å   | Atom | Atom | Length/Å  |
|------|------|------------|------|------|-----------|
| Al1  | O1   | 1.7746(12) | C8   | C9   | 1.447(2)  |
| Al1  | N1   | 1.9677(14) | C10  | C11  | 1.541(2)  |
| Al1  | C1   | 1.9579(19) | C10  | C12  | 1.537(2)  |
| Al1  | C2   | 1.9558(19) | C10  | C13  | 1.530(2)  |
| O1   | C3   | 1.3303(19) | C14  | C15  | 1.535(2)  |
| N1   | C9   | 1.295(2)   | C14  | C16  | 1.532(2)  |
| N1   | C18  | 1.472(2)   | C14  | C17  | 1.529(2)  |
| C3   | C4   | 1.420(2)   | C18  | C19  | 1.531(2)  |
| C3   | C8   | 1.415(2)   | C19  | C20  | 1.523(2)  |
| C4   | C5   | 1.388(2)   | C19  | C21  | 1.518(2)  |
| C4   | C10  | 1.542(2)   | C22  | C23  | 1.458(12) |
| C5   | C6   | 1.409(2)   | C23  | C24  | 1.481(10) |
| C6   | C7   | 1.373(2)   | C24  | C25  | 1.559(8)  |
| C6   | C14  | 1.538(2)   | C25  | C26  | 1.487(6)  |

C7                      C8                      1.412(2)

**Table S9. Bond Angles (°) for 5.**

| Atom | Atom | Atom | Angle/°    | Atom | Atom | Atom | Angle/°    |
|------|------|------|------------|------|------|------|------------|
| O1   | Al1  | N1   | 94.11(5)   | C7   | C8   | C3   | 120.64(14) |
| O1   | Al1  | C1   | 110.74(7)  | C7   | C8   | C9   | 116.66(14) |
| O1   | Al1  | C2   | 111.44(8)  | N1   | C9   | C8   | 126.64(14) |
| C1   | Al1  | N1   | 108.26(7)  | C11  | C10  | C4   | 109.49(13) |
| C2   | Al1  | N1   | 109.63(7)  | C12  | C10  | C4   | 110.49(13) |
| C2   | Al1  | C1   | 119.61(9)  | C12  | C10  | C11  | 109.80(14) |
| C3   | O1   | Al1  | 126.62(10) | C13  | C10  | C4   | 111.95(13) |
| C9   | N1   | Al1  | 119.35(11) | C13  | C10  | C11  | 107.58(14) |
| C9   | N1   | C18  | 118.33(13) | C13  | C10  | C12  | 107.47(14) |
| C18  | N1   | Al1  | 122.27(10) | C15  | C14  | C6   | 109.15(13) |
| O1   | C3   | C4   | 120.78(14) | C16  | C14  | C6   | 109.77(14) |
| O1   | C3   | C8   | 120.27(14) | C16  | C14  | C15  | 109.49(15) |
| C8   | C3   | C4   | 118.90(14) | C17  | C14  | C6   | 111.86(13) |
| C3   | C4   | C10  | 120.76(13) | C17  | C14  | C15  | 108.16(14) |
| C5   | C4   | C3   | 117.48(14) | C17  | C14  | C16  | 108.38(15) |
| C5   | C4   | C10  | 121.74(14) | N1   | C18  | C19  | 112.72(12) |
| C4   | C5   | C6   | 124.75(14) | C20  | C19  | C18  | 108.54(13) |
| C5   | C6   | C14  | 119.95(14) | C21  | C19  | C18  | 111.66(13) |
| C7   | C6   | C5   | 116.84(14) | C21  | C19  | C20  | 111.60(14) |
| C7   | C6   | C14  | 123.21(14) | C22  | C23  | C24  | 116.4(10)  |
| C6   | C7   | C8   | 121.39(14) | C23  | C24  | C25  | 111.9(8)   |
| C3   | C8   | C9   | 122.55(14) | C26  | C25  | C24  | 110.4(5)   |

**Table S10. Bond Lengths (Å) for 6.**

| Atom | Atom | Length/Å   | Atom | Atom | Length/Å |
|------|------|------------|------|------|----------|
| Zr1  | O1   | 2.0466(18) | C3   | C4   | 1.396(4) |
| Zr1  | N1   | 2.393(2)   | C4   | C5   | 1.388(4) |
| Zr1  | N2   | 2.042(2)   | C4   | C11  | 1.535(4) |
| Zr1  | N3   | 2.046(3)   | C5   | C6   | 1.401(4) |
| Zr1  | N4   | 2.079(3)   | C6   | C15  | 1.445(4) |
| O1   | C1   | 1.329(3)   | C7   | C8   | 1.538(4) |
| N1   | C15  | 1.289(3)   | C7   | C9   | 1.535(4) |
| N1   | C16  | 1.471(3)   | C7   | C10  | 1.533(4) |
| N2   | C20  | 1.453(4)   | C11  | C3A  | 1.624(7) |
| N2   | C21  | 1.463(4)   | C11  | C5A  | 1.562(6) |
| N3   | C22  | 1.452(4)   | C11  | C6A  | 1.469(6) |
| N3   | C23  | 1.453(4)   | C11  | C12  | 1.541(6) |
| N4   | C24  | 1.454(4)   | C11  | C14  | 1.403(7) |
| N4   | C25  | 1.461(4)   | C11  | C13  | 1.613(7) |
| C1   | C2   | 1.419(4)   | C16  | C17  | 1.532(4) |
| C1   | C6   | 1.415(4)   | C17  | C18  | 1.516(4) |
| C2   | C3   | 1.395(4)   | C17  | C19  | 1.518(5) |
| C2   | C7   | 1.537(4)   |      |      |          |

**Table S11. Bond Angles (°) for 6.**

| Atom | Atom | Atom | Angle/°    | Atom | Atom | Atom | Angle/°  |
|------|------|------|------------|------|------|------|----------|
| O1   | Zr1  | N1   | 75.11(8)   | C3   | C4   | C11  | 121.3(2) |
| O1   | Zr1  | N4   | 95.06(9)   | C5   | C4   | C3   | 117.1(2) |
| N2   | Zr1  | O1   | 134.58(9)  | C5   | C4   | C11  | 121.6(3) |
| N2   | Zr1  | N1   | 81.98(8)   | C4   | C5   | C6   | 121.2(3) |
| N2   | Zr1  | N3   | 112.30(10) | C1   | C6   | C15  | 121.8(2) |

|     |     |     |            |     |     |     |          |
|-----|-----|-----|------------|-----|-----|-----|----------|
| N2  | Zr1 | N4  | 93.24(10)  | C5  | C6  | C1  | 120.7(2) |
| N3  | Zr1 | O1  | 109.04(9)  | C5  | C6  | C15 | 117.3(2) |
| N3  | Zr1 | N1  | 96.96(10)  | C2  | C7  | C8  | 110.8(2) |
| N3  | Zr1 | N4  | 103.11(11) | C9  | C7  | C2  | 111.9(2) |
| N4  | Zr1 | N1  | 159.68(9)  | C9  | C7  | C8  | 106.6(2) |
| C1  | O1  | Zr1 | 141.29(16) | C10 | C7  | C2  | 109.4(2) |
| C15 | N1  | Zr1 | 125.49(18) | C10 | C7  | C8  | 110.2(3) |
| C15 | N1  | C16 | 116.0(2)   | C10 | C7  | C9  | 108.0(2) |
| C16 | N1  | Zr1 | 118.31(16) | C4  | C11 | C3A | 109.5(3) |
| C20 | N2  | Zr1 | 130.74(19) | C4  | C11 | C5A | 111.0(3) |
| C20 | N2  | C21 | 110.9(2)   | C4  | C11 | C12 | 106.9(3) |
| C21 | N2  | Zr1 | 118.14(19) | C4  | C11 | C13 | 105.2(3) |
| C22 | N3  | Zr1 | 127.5(2)   | C5A | C11 | C3A | 103.0(4) |
| C22 | N3  | C23 | 111.2(2)   | C6A | C11 | C4  | 116.2(3) |
| C23 | N3  | Zr1 | 121.2(2)   | C6A | C11 | C3A | 105.8(4) |
| C24 | N4  | Zr1 | 118.2(2)   | C6A | C11 | C5A | 110.3(4) |
| C24 | N4  | C25 | 110.2(3)   | C12 | C11 | C13 | 106.1(4) |
| C25 | N4  | Zr1 | 131.4(2)   | C14 | C11 | C4  | 114.1(3) |
| O1  | C1  | C2  | 121.3(2)   | C14 | C11 | C12 | 114.3(4) |
| O1  | C1  | C6  | 119.9(2)   | C14 | C11 | C13 | 109.7(4) |
| C6  | C1  | C2  | 118.8(2)   | N1  | C15 | C6  | 127.5(3) |
| C1  | C2  | C7  | 120.8(2)   | N1  | C16 | C17 | 112.0(2) |
| C3  | C2  | C1  | 117.6(2)   | C18 | C17 | C16 | 109.6(3) |
| C3  | C2  | C7  | 121.5(2)   | C18 | C17 | C19 | 111.3(3) |
| C2  | C3  | C4  | 124.3(2)   | C19 | C17 | C16 | 111.7(3) |

### Buried Volume Calculations

Buried volume calculation (<https://www.molnac.unisa.it/OMtools/sambvca2.0/index.html>) gives a measure of the space occupied by the ligand in the first coordination sphere of the metal in transition metal complexes.<sup>25</sup> Thus, crystal structures of **1** and **6** were used as models to calculate

the percentage buried volume, %V<sub>Bur</sub>, for the ligand backbones of bis-**FI** and mono-**FI** catalysts. The radius (R) of the sphere around the metal center was set to 3.5 Å and a mesh of 0.1 Å was used to scan the sphere. NMe<sub>2</sub> groups remaining on the Zr of **1** and **6** were removed in order to analyze the influence of the ancillary ligand only. As discussed above, we proposed that the unusual catalyst precursor effects on comonomer incorporation are due to the reduced steric bulk around Zr after abstraction of one **FI** ligand by TMA from **1** during the alkylation step. Thus, we evaluated steric crowding maps of mono- and bis-**FI** ligated Zr catalysts by performing buried volume calculations.<sup>28</sup> The percentage buried volume, %V<sub>Bur</sub>, for the backbones of bis-**FI** and mono-**FI** catalysts within a radius of 3.5 Å around the metal center was calculated. The %V<sub>Bur</sub> for the **FI**<sub>2</sub>Zr backbone is significantly higher (77.4%) than the **FI**Zr backbone (58.9%), suggesting the mono-**FI** ligated Zr catalyst is far less bulky than the bis-**FI** ligated Zr catalyst. This makes coordination of the 1-octene comonomer more selective. This likely explains the high incorporation capacity of mono-ligated **FI**Zr catalysts that are generated from the TMA-alkylations of **1** and **6**.

#### **FI<sub>2</sub>Zr:**

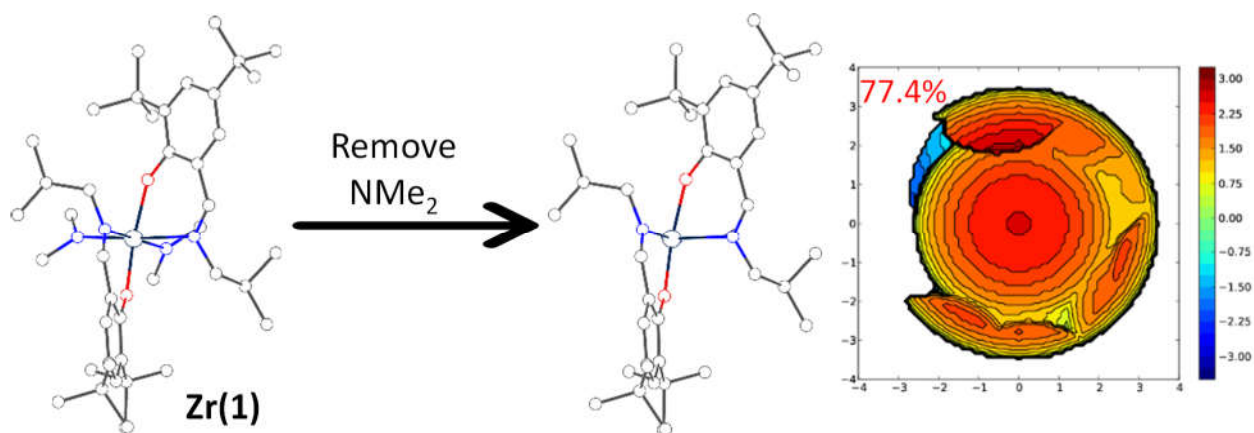

#### **FI<sub>1</sub>Zr:**

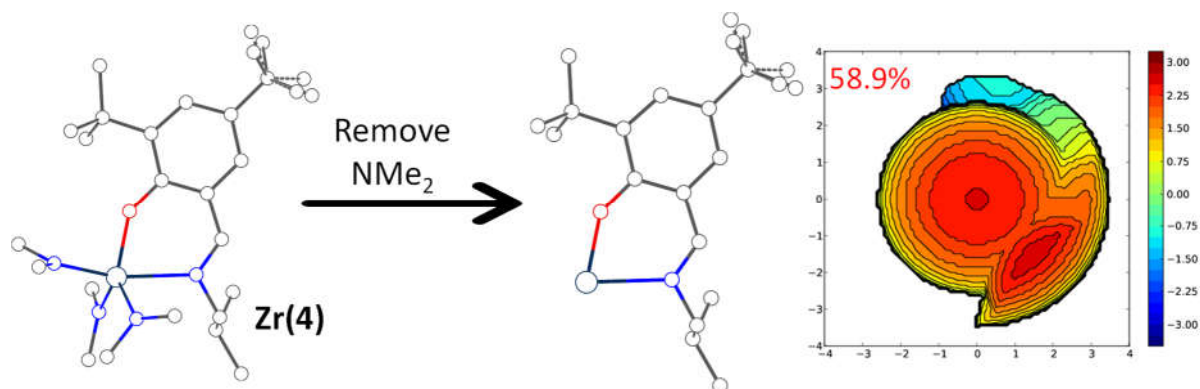

Buried Volume Calculation Results:

|                    | V Free | V Buried | V Total | V Exact | %V Free | %V Bur      | % Tot/Ex |
|--------------------|--------|----------|---------|---------|---------|-------------|----------|
| Fl <sub>2</sub> Zr | 40.6   | 138.9    | 179.5   | 179.6   | 22.6    | <b>77.4</b> | 100.0    |
| FlZr               | 73.7   | 105.8    | 179.5   | 179.6   | 41.1    | <b>58.9</b> | 100.0    |

Fl<sub>2</sub>Zr:

| Quadrant | V_f  | V_b  | V_t  | %V_f | %V_b |
|----------|------|------|------|------|------|
| SW       | 13.8 | 31.0 | 44.9 | 30.8 | 69.2 |
| NW       | 14.1 | 30.8 | 44.9 | 31.4 | 68.6 |
| NE       | 6.1  | 38.8 | 44.8 | 13.5 | 86.5 |
| SE       | 6.6  | 38.2 | 44.9 | 14.8 | 85.2 |

FlZr:

| Quadrant | V_f  | V_b  | V_t  | %V_f | %V_b |
|----------|------|------|------|------|------|
| SW       | 26.3 | 18.6 | 44.9 | 58.5 | 41.5 |
| NW       | 24.9 | 20.0 | 44.9 | 55.5 | 44.5 |
| NE       | 12.4 | 32.5 | 44.8 | 27.6 | 72.4 |
| SE       | 10.2 | 34.7 | 44.9 | 22.6 | 77.4 |

## Polymer Characterization

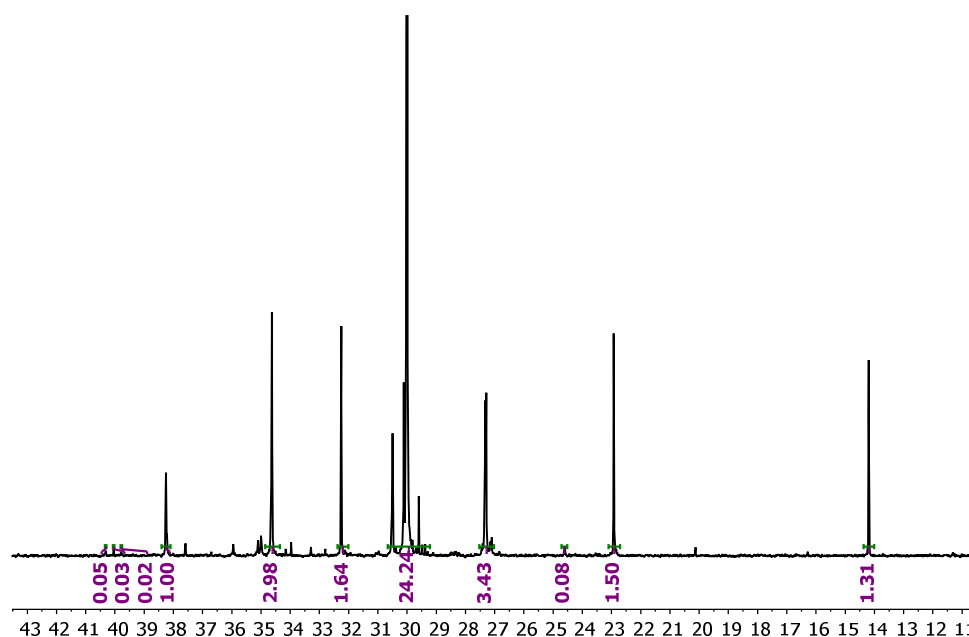

**Figure S25.** (Table 1, entry 2)  $^{13}\text{C}$  NMR spectrum (151 MHz) of poly(ethylene-*co*-1-octene) in 1,1,2,2-tetrachloroethane- $d_2$  at 120 °C. Reaction conditions: **1** (10  $\mu\text{mol}$ , 1.0 equiv); TMA (0.4 mmol, 40 equiv); BT (12  $\mu\text{mol}$ , 1.2 equiv).

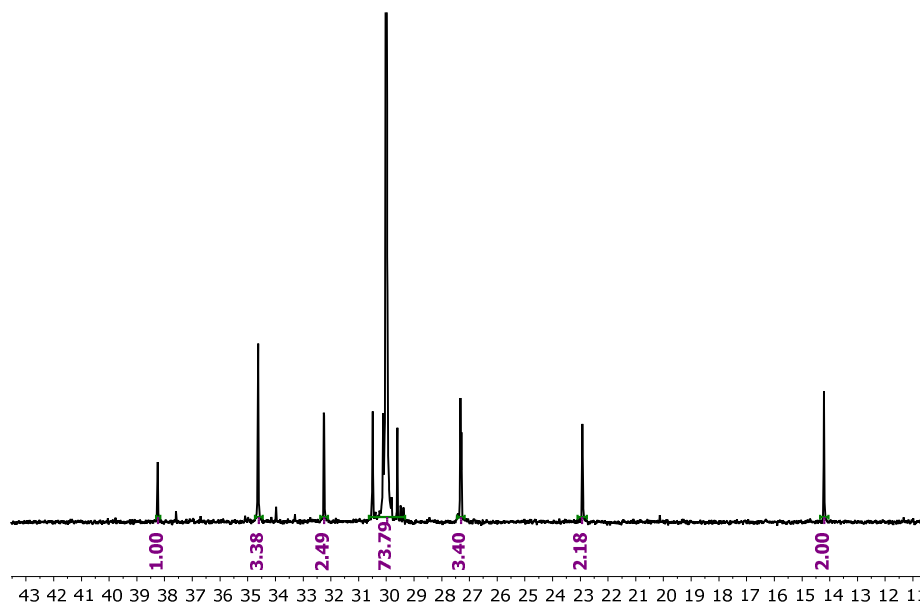

**Figure S26.** (Table 1, entry 3)  $^{13}\text{C}$  NMR spectrum (151 MHz) of poly(ethylene-*co*-1-octene) in 1,1,2,2-tetrachloroethane- $d_2$  at 120 °C. Reaction conditions: **1** (10  $\mu\text{mol}$ , 1.0 equiv); TMA (1.2 mmol, 120 equiv); BT (12  $\mu\text{mol}$ , 1.2 equiv).

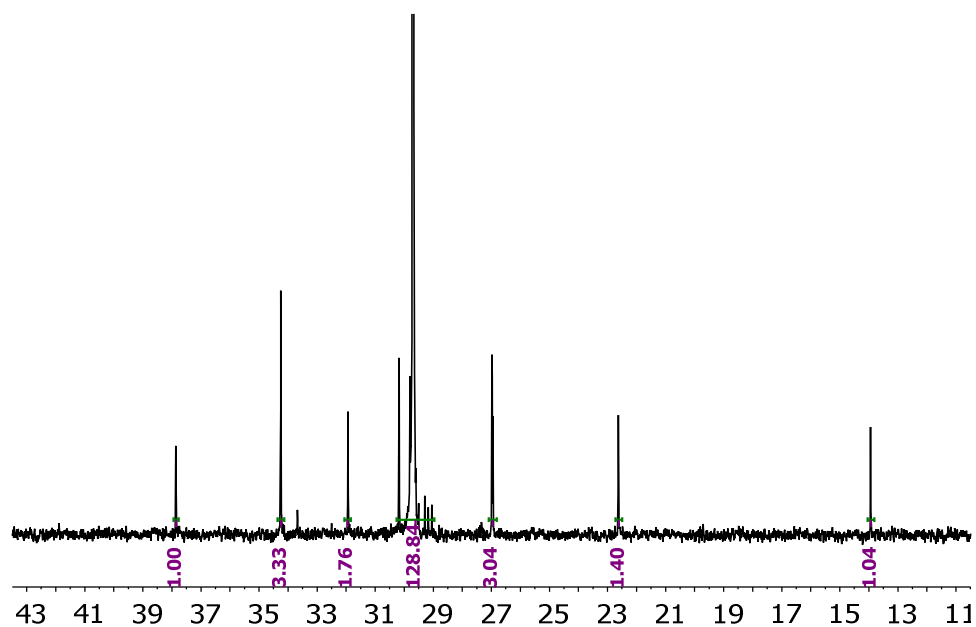

**Figure S27.** (Table 1, entry 4) <sup>13</sup>C NMR spectrum (151 MHz) of poly(ethylene-*co*-1-octene) in 1,1,2,2-tetrachloroethane-*d*<sub>2</sub> at 120 °C. Reaction conditions: **2** (10 μmol, 1.0 equiv); TMA (0 equiv); BT (12 μmol, 1.2 equiv).

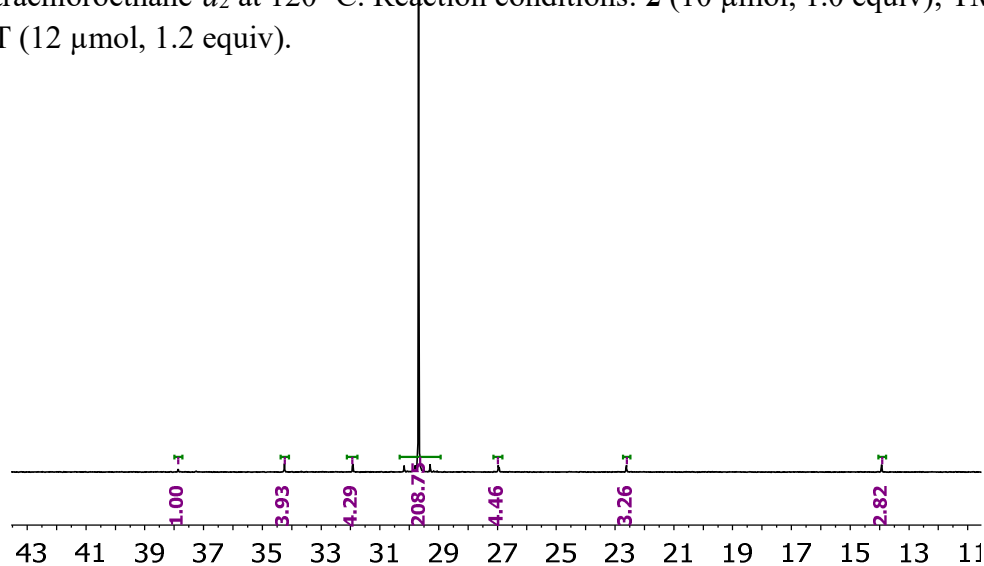

**Figure S28.** (Table 1, entry 5) <sup>13</sup>C NMR spectrum (151 MHz) of poly(ethylene-*co*-1-octene) in 1,1,2,2-tetrachloroethane-*d*<sub>2</sub> at 120 °C. Reaction conditions: **2** (10 μmol, 1.0 equiv); TMA (0.4 mmol, 40 equiv); BT (12 μmol, 1.2 equiv).



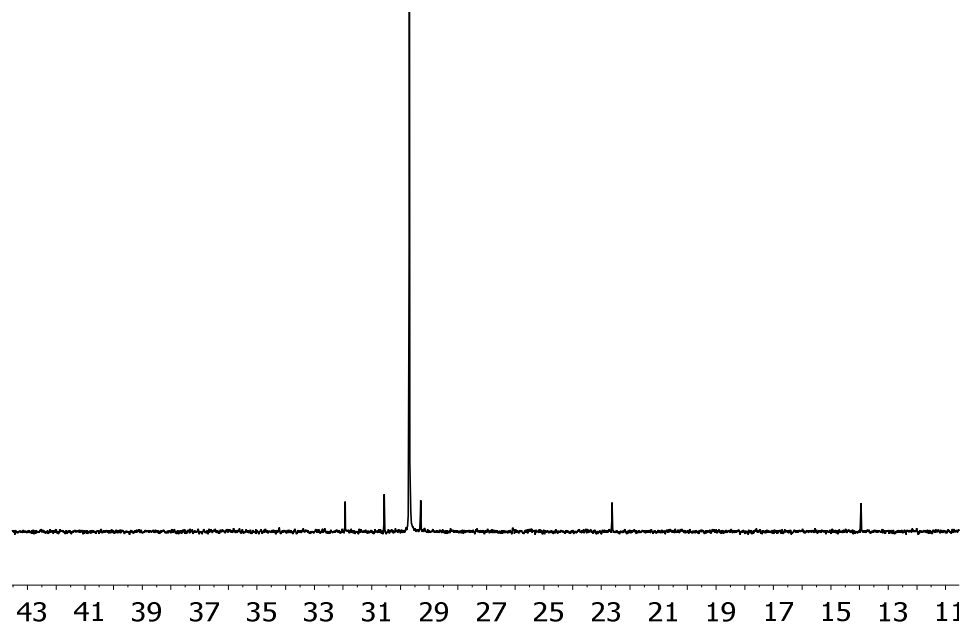

**Figure S29.** (Table 1, entry 6)  $^{13}\text{C}$  NMR spectrum (151 MHz) of poly(ethylene-*co*-1-octene) in 1,1,2,2-tetrachloroethane- $d_2$  at 120 °C. Reaction conditions: **2** (10  $\mu\text{mol}$ , 1.0 equiv); TMA (1.2 mmol, 120 equiv); BT (12  $\mu\text{mol}$ , 1.2 equiv).

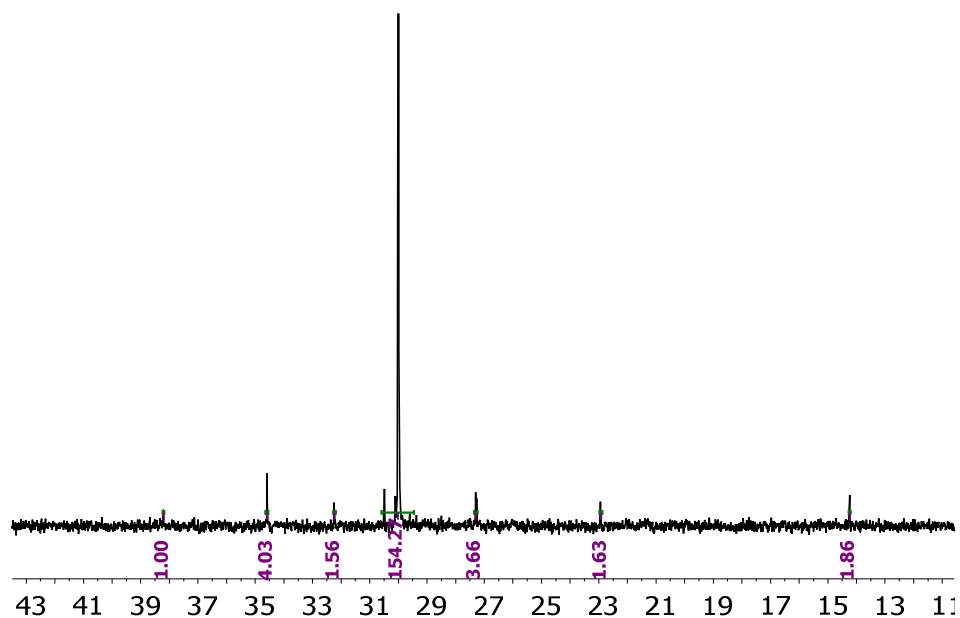

**Figure S30.** (Table 1, entry 7)  $^{13}\text{C}$  NMR spectrum (151 MHz) of poly(ethylene-*co*-1-octene) in 1,1,2,2-tetrachloroethane- $d_2$  at 120 °C. Reaction conditions: **3** (10  $\mu\text{mol}$ , 1.0 equiv); TMA (0 equiv); BT (12  $\mu\text{mol}$ , 1.2 equiv).

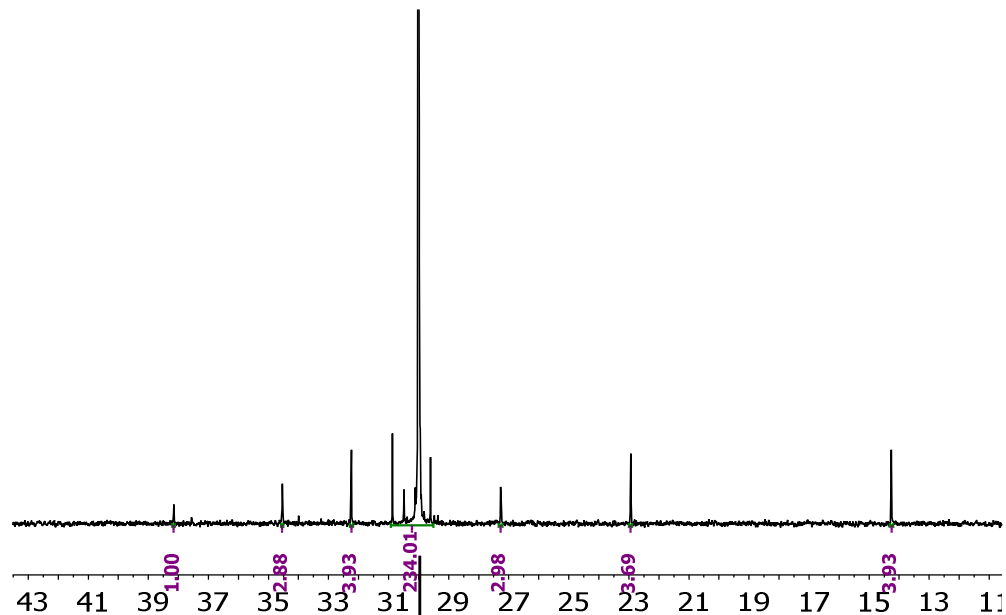

**Figure S31.** (Table 1, entry 8)  $^{13}\text{C}$  NMR spectrum (151 MHz) of poly(ethylene-*co*-1-octene) in 1,1,2,2-tetrachloroethane- $d_2$  at 120 °C. Reaction conditions: **3** (10  $\mu\text{mol}$ , 1.0 equiv); TMA (0.4 mmol, 40 equiv); BT (12  $\mu\text{mol}$ , 1.2 equiv).

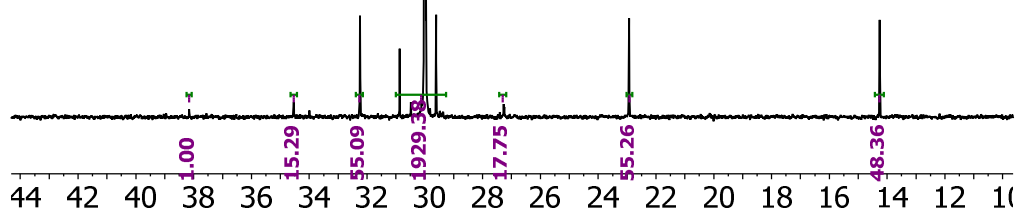

**Figure S32.** (Table 1, entry 9)  $^{13}\text{C}$  NMR spectrum (151 MHz) of poly(ethylene-*co*-1-octene) in 1,1,2,2-tetrachloroethane- $d_2$  at 120 °C. Reaction conditions: **3** (10  $\mu\text{mol}$ , 1.0 equiv); TMA (1.2 mmol, 120 equiv); BT (12  $\mu\text{mol}$ , 1.2 equiv).

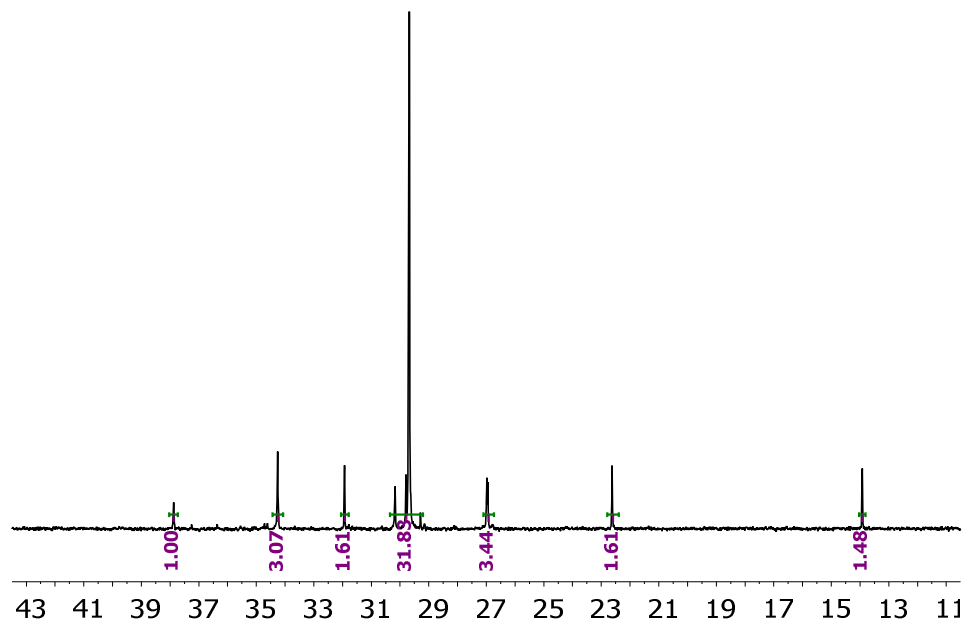

**Figure S33.** (Table 1, entry 13)  $^{13}\text{C}$  NMR spectrum (151 MHz) of poly(ethylene-*co*-1-octene) in 1,1,2,2-tetrachloroethane- $d_2$  at 120 °C. Reaction conditions: **6** (10  $\mu\text{mol}$ , 1.0 equiv); TMA (0.4 mmol, 40 equiv); BT (12  $\mu\text{mol}$ , 1.2 equiv).

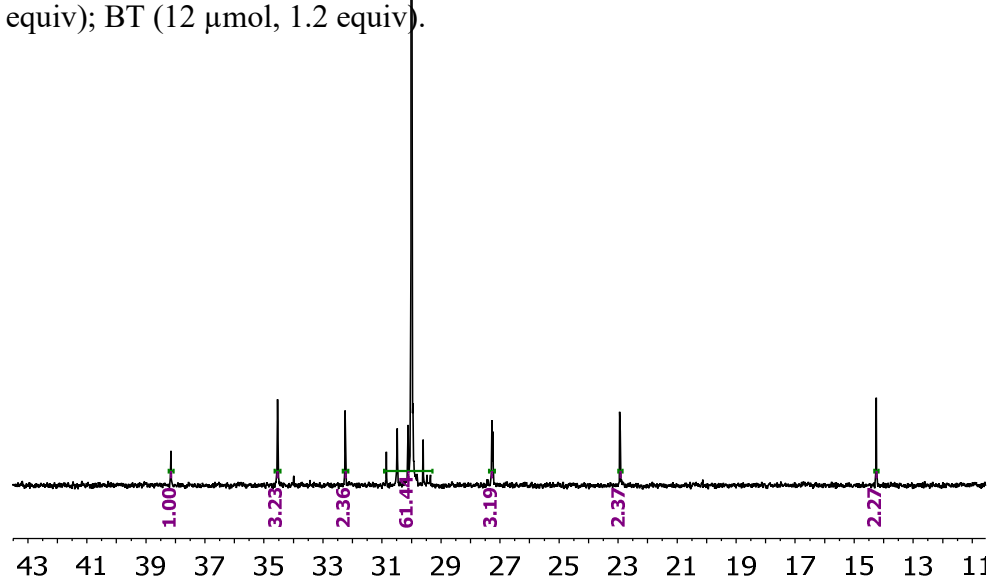

**Figure S34.** (Table 1, entry 14)  $^{13}\text{C}$  NMR spectrum (151 MHz) of poly(ethylene-*co*-1-octene) in 1,1,2,2-tetrachloroethane- $d_2$  at 120 °C. Reaction conditions: **6** (10  $\mu\text{mol}$ , 1.0 equiv); TMA (1.2 mmol, 120 equiv); BT (12  $\mu\text{mol}$ , 1.2 equiv).

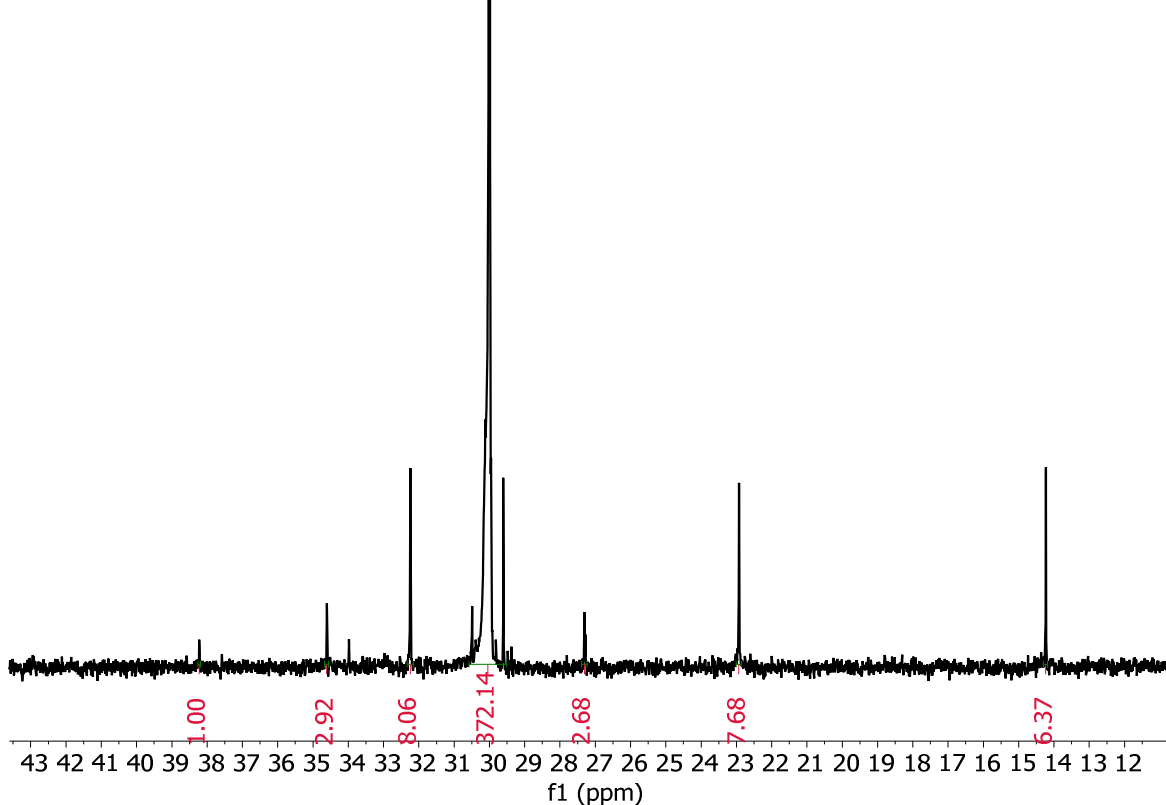

**Figure S35.** (Table 1, entry 16)  $^{13}\text{C}$  NMR spectrum (151 MHz) of poly(ethylene-*co*-1-octene) in 1,1,2,2-tetrachloroethane- $d_2$  at 120 °C. Reaction conditions: **6** (10  $\mu\text{mol}$ , 1.0 equiv); TMA (1.2 mmol, 120 equiv);  $\text{Al}_2(\text{NMe}_2)_2\text{Me}_4$  (10  $\mu\text{mol}$ , 1.0 equiv); BT (12  $\mu\text{mol}$ , 1.2 equiv).

## References

1. Pangborn, A. B.; Giardello, M. A.; Grubbs, R. H.; Rosen, R. K.; Timmers, F. J., Safe and Convenient Procedure for Solvent Purification. *Organometallics* **1996**, *15*, 1518-1520.
2. Galland, G. B.; de Souza, R. F.; Mauler, R. S.; Nunes, F. F.,  $^{13}\text{C}$  NMR Determination of the Composition of Linear Low-Density Polyethylene Obtained with  $[\eta^3\text{-Methallyl-nickel-diimine}]\text{PF}_6$  Complex. *Macromolecules* **1999**, *32*, 1620-1625.
3. Zhang, C. M.; Pan, H. Q.; Klosin, J.; Tu, S. Y.; Jaganathan, A., Synthetic Optimization and Scale-Up of Imino-Amido Hafnium and Zirconium Olefin Polymerization Catalysts. *Organic Process Research & Development* **2015**, *19*, 1383-1391.
4. Makio, H.; Prasad, A. V.; Terao, H.; Saito, J.; Fujita, T., Isospecific Propylene Polymerization with *in situ* Generated Bis(phenoxy-amine)zirconium and Hafnium Single Site Catalysts. *Dalton Trans.* **2013**, *42*, 9112-9119.
5. Edson, J. B.; Wang, Z.; Kramer, E. J.; Coates, G. W., Fluorinated Bis(phenoxyketimine)titanium Complexes for the Living, Isoselective Polymerization of

Propylene: Multiblock Isotactic Polypropylene Copolymers via Sequential Monomer Addition. *J. Am. Chem. Soc.* **2008**, *130*, 4968-4977.

6. Fujita, T.; Kawai, K., FI Catalysts for Olefin Oligomerization and Polymerization: Production of Useful Olefin-Based Materials by Unique Catalysis. *Topics in Catalysis* **2014**, *57*, 852-877.

7. Tohi, Y.; Makio, H.; Matsui, S.; Onda, M.; Fujita, T., Polyethylenes with Uni-, Bi-, and Trimodal Molecular Weight Distributions Produced with a Single Bis(phenoxy-imine)zirconium Complex. *Macromolecules* **2003**, *36*, 523-525.

8. Matsui, S.; Mitani, M.; Saito, J.; Tohi, Y.; Makio, H.; Matsukawa, N.; Takagi, Y.; Tsuru, K.; Nitabaru, M.; Nakano, T.; Tanaka, H.; Kashiwa, N.; Fujita, T., A Family of Zirconium Complexes Having Two Phenoxy-Imine Chelate Ligands for Olefin Polymerization. *J. Am. Chem. Soc.* **2001**, *123*, 6847-6856.

9. Lee, C.-L.; Lin, Y.-F.; Jiang, M.-T.; Lu, W.-Y.; Vandavasi, J. K.; Wang, L.-F.; Lai, Y.-C.; Chiang, M. Y.; Chen, H.-Y., Improvement in Aluminum Complexes Bearing Schiff Bases in Ring-Opening Polymerization of  $\epsilon$ -Caprolactone: A Five-Membered-Ring System. *Organometallics* **2017**, *36*, 1936-1945.

10. Thomas, C. J.; Krannich, L. K.; Watkins, C. L., Reactivity of  $(\text{Me}_3\text{Al})_2$  with Selected Aminoarsines and Secondary Amines. *Polyhedron* **1993**, *12*, 389-399.

11. Gowda, R. R.; Chen, E. Y. X., Chiral and Achiral (imino)phenoxy-Based Cationic Group 4 Non-metallocene Complexes as Catalysts for Polymerization of Renewable  $\alpha$ -methylene- $\gamma$ -butyrolactones. *Dalton Trans.* **2013**, *42*, 9263-9273.

12. Sattler, A.; VanderVelde, D. G.; Labinger, J. A.; Bercaw, J. E., Lewis Acid Promoted Titanium Alkylidene Formation: Off-Cycle Intermediates Relevant to Olefin Trimerization Catalysis. *J. Am. Chem. Soc.* **2014**, *136*, 10790-10800.

13. Sattler, A.; Labinger, J. A.; Bercaw, J. E., Highly Selective Olefin Trimerization Catalysis by a Borane-Activated Titanium Trimethyl Complex. *Organometallics* **2013**, *32*, 6899-6902.

14. Mason, A. F.; Coates, G. W., Gel Permeation Chromatography as a Combinatorial Screening Method: Identification of Highly Active Heteroligated Phenoxyimine Polymerization Catalysts. *J. Am. Chem. Soc.* **2004**, *126*, 10798-10799.

15. Yao, E. D.; Wang, J. C.; Chen, Z. T.; Ma, Y. G., Homo- and Heteroligated Salicylaldiminato Titanium Complexes with Different Substituents Ortho to the Phenoxy Oxygens for Ethylene and Ethylene/1-Hexene (Co)polymerization. *Macromolecules* **2014**, *47*, 8164-8170.
16. Pennington, D. A.; Clegg, W.; Coles, S. J.; Harrington, R. W.; Hursthouse, M. B.; Hughes, D. L.; Light, M. E.; Schormann, M.; Bochmann, M.; Lancaster, S. J., The Synthesis, Structure and Ethene Polymerisation Catalysis of Mono(salicylaldiminato) Titanium and Zirconium Complexes. *Dalton Trans.* **2005**, 561-571.
17. Goerl, C.; Betthausen, E.; Alt, H. G., Di- and Trinuclear Iron/Titanium and Iron/zirconium Complexes with Heterocyclic Ligands as Catalysts for Ethylene Polymerization. *Polyhedron* **2016**, *118*, 37-51.
18. Flisak, Z., Theoretical study of isomerism in phenoxyimine-based precursors of coordinative olefin polymerization catalysts. *J. Mol. Catal. A: Chem.* **2010**, *316*, 83-89.
19. Makio, H.; Terao, H.; Iwashita, A.; Fujita, T., FI Catalysts for Olefin Polymerization-A Comprehensive Treatment. *Chem. Rev.* **2011**, *111*, 2363-2449.
20. Zhang, C.; Pan, H.; Klosin, J.; Tu, S.; Jaganathan, A.; Fontaine, P. P., Synthetic Optimization and Scale-up of Imino-Amido Hafnium and Zirconium Olefin Polymerization Catalysts. *Org. Process Res. Dev.* **2015**, *19*, 1383-1391.
21. Dolomanov, O. V.; Bourhis, L. J.; Gildea, R. J.; Howard, J. A. K.; Puschmann, H., OLEX2: a complete structure solution, refinement and analysis program. *J. Appl. Cryst.* **2009**, *42*, 339-341.
22. Sheldrick, G., SHELXT - Integrated Space-Group and Crystal-Structure Determination. *Acta Crystallogr. A* **2015**, *71*, 3-8.
23. Sheldrick, G. M., Crystal Structure Refinement with SHELXL. *Acta Crystallogr. C* **2015**, *71*, 3-8.
24. Thorn, A.; Dittrich, B.; Sheldrick, G. M., Enhanced Rigid-Bond Restraints. *Acta Crystallogr. A* **2012**, *68*, 448-451.
25. Falivene, L.; Credendino, R.; Poater, A.; Petta, A.; Serra, L.; Oliva, R.; Scarano, V.; Cavallo, L., SambVca 2. A Web Tool for Analyzing Catalytic Pockets with Topographic Steric Maps. *Organometallics* **2016**, *35*, 2286-2293.
